# Supplementary material
Source: HighWire-hosted journal article supplement (https://cmajopen.ca/highwire/filestream/85128/field_highwire_adjunct_files/5/CMAJOpen-2020-0068-3-at.pdf)
Supplement: CMAJOpen-2020-0068-3-at.pdf [file CMAJOpen-2020-0068-3-at.pdf]

Appendix 3 (as supplied by the authors): Characteristics of the 196 studies included in systematic review

| Author                               | Country              | Region                  | No. of Residents | Age                 | Males No. (%) | Specialty                      | Year of Survey | Tool to Measure Burnout                            | Experiencing Burnout (%) | Definition of Burnout   |
|--------------------------------------|----------------------|-------------------------|------------------|---------------------|---------------|--------------------------------|----------------|----------------------------------------------------|--------------------------|-------------------------|
| Abdulrahman et al, 2018 <sup>1</sup> | United Arab Emirates | ME & NA                 | 302              | NR                  | 63 (21.0)     | Multiple                       | 2016           | MBI                                                | 70.20%                   | High EE or DP           |
| Afzal et al, 2010 <sup>2</sup>       | USA                  | North America           | 115              | NR                  | 67 (58.0)     | Multiple                       | 2008           | MBI                                                | NR                       | NR                      |
| Agha et al, 2015 <sup>3</sup>        | Saudi Arabia         | ME & NA                 | 96               | NR                  | 64 (67)       | Multiple                       | NS             | MBI                                                | 88.54%                   | High EE or DP or low PA |
| Akdeniz et al, 2011 <sup>4</sup>     | Turkey               | Asia                    | 174              | Mean: 32.2, SD: 4.5 | 74 (42.4)     | General Practice               | 2008           | MBI                                                | NR                       | NR                      |
| Aksoy et al, 2014 <sup>5</sup>       | Turkey               | Asia                    | 28               | Mean: 25.9, SD: 2.0 | 10 (47)       | Pediatrics                     | NS             | MBI                                                | 27.27%                   | High EE or DP           |
| Aksoy et al, 2014 <sup>5</sup>       | Turkey               | Asia                    | 38               | Mean: 26.6, SD: 1.5 | 16 (47)       | Internal Medicine              | NS             | MBI                                                | 33.33%                   | High EE or DP           |
| Al Atassi et al, 2018 <sup>6</sup>   | USA                  | North America           | 238              | NR                  | 190 (80.0)    | Oral and Maxillofacial Surgery | 2017           | MBI                                                | NR                       | NR                      |
| Al-Dubai et al, 2013 <sup>7</sup>    | Malaysia             | Asia                    | 191              | Mean: 26.5, SD: 1.6 | 85 (44.5)     | Multiple                       | NS             | MBI                                                | NR                       | NR                      |
| Al-Ma'mari et al, 2016 <sup>8</sup>  | Canada               | North America           | 143              | NR                  | 19 (13.0)     | Obstetrics and Gynecology      | NS             | MBI                                                | 73.70%                   | High EE or DP or low PA |
| Aldrees et al, 2013 <sup>9</sup>     | Saudi Arabia         | ME & NA                 | 159              | NR                  | NR            | Multiple                       | 2010           | MBI                                                | 86.00%                   | High EE or DP or low PA |
| Aldrees et al, 2015 <sup>10</sup>    | Saudi Arabia         | ME & NA                 | 85               | Mean: 29, SD: 2.3   | 57 (67)       | Otolaryngology                 | 2013           | MBI                                                | 45.00%                   | High EE and DP          |
| Aldrees et al, 2017 <sup>11</sup>    | Saudi Arabia         | ME & NA                 | 38               | Mean: 28, SD 1.9    | 28 (74)       | Plastic Surgery                | 2015           | MBI                                                | 47.00%                   | High EE and DP          |
| Anil et al, 2017 <sup>12</sup>       | Turkey               | Asia                    | 71               | Mean: 27.8, SD: 1.7 | 24 (33)       | Pediatrics                     | 2010           | MBI                                                | NR                       | NR                      |
| Antiel et al, 2013 <sup>13</sup>     | USA                  | North America           | 156              | NR                  | 106 (68.0)    | General surgery                | 2012           | Modified MBI (2-Single Item Measures of EE and DP) | NR                       | NR                      |
| Arora et al, 2014 <sup>14</sup>      | Australia            | Australia & New Zealand | 51               | NR                  | NR            | Orthopedic Surgery             | 2012           | MBI                                                | 53.00%                   | High EE or DP           |
| Ashkar et al, 2010 <sup>15</sup>     | Lebanon              | ME & NA                 | 155              | NR                  | 86 (55.5)     | Multiple                       | 2008           | MBI                                                | 80.00%                   | High EE or DP or low PA |
| Attenello et al, 2018 <sup>16</sup>  | USA                  | North America           | 346              | NR                  | 270 (78.0)    | Neurosurgery                   | 2015           | MBI                                                | 67.00%                   | High EE or DP           |
| Baer et al, 2017 <sup>17</sup>       | USA                  | North America           | 258              | Mean: 29.4, SD: 2.3 | 54 (21.1)     | Pediatrics                     | 2013           | Modified MBI (2-Single Item Measures of EE and DP) | 39.10%                   | High EE or DP           |

|                                          |             |               |     |                                                                   |            |                           |              |                                              |        |                             |
|------------------------------------------|-------------|---------------|-----|-------------------------------------------------------------------|------------|---------------------------|--------------|----------------------------------------------|--------|-----------------------------|
| Barrack et al, 2006 <sup>18</sup>        | USA         | North America | 34  | Mean: 30.5, SD: 2.6                                               | 29 (85)    | Orthopedic Surgery        | 2005         | MBI                                          | NR     | NR                          |
| Becker et al, 2006 <sup>19</sup>         | USA         | North America | 118 | Mean: 29.3, SD: 3                                                 | 25 (20.8)  | Obstetrics and Gynecology | 2004         | MBI                                          | 21.00% | High EE + DP                |
| Beckman et al, 2010 <sup>20</sup>        | USA         | North America | 131 | NR                                                                | 82 (62.7)  | Internal Medicine         | 2007         | MBI                                          | NR     | NR                          |
| Beckman et al, 2011 <sup>21</sup>        | USA         | North America | 202 | NR                                                                | 116 (57.4) | Internal Medicine         | 2009         | MBI                                          | NR     | High EE or DP               |
| Belayachi et al, 2016 <sup>22</sup>      | Morocco     | Africa        | 198 | Mean: 29.3, SD: 3.2                                               | 82 (41.4)  | Multiple                  | 2010         | MBI                                          | NR     | NR                          |
| Bellolio et al, 2014 <sup>23</sup>       | USA         | North America | 188 | NR                                                                | 34 (18.0)  | Multiple                  | NS           | Professional Quality of Life Scale Version 5 | NR     | >=42                        |
| Biaggi et al, 2003 <sup>24</sup>         | Switzerland | Europe        | 60  | 33.7 (total); residents (n=39), 31; chief residents (n=21): 38.6. | 36 (60)    | Multiple                  | 2000         | Seven point scale                            | 41.70% | NR                          |
| Billings et al, 2011 <sup>25</sup>       | USA         | North America | 284 | NR                                                                | 131 (46.0) | Internal Medicine         | 2008 to 2010 | MBI                                          | 45.00% | High EE or DP               |
| Blanchard et al, 2010 <sup>26</sup>      | France      | Europe        | 204 | NR                                                                | 82 (40.0)  | Oncology                  | 2009         | MBI                                          | 44.00% | High EE or DP               |
| Block et al, 2013 <sup>27</sup>          | USA         | North America | 55  | Mean: 29, SD: 3                                                   | 29 (53)    | Internal Medicine         | 2011         | Modified MBI (6 items)                       | 76.00% | NS                          |
| Bogg et al, 2001 <sup>28</sup>           | England     | Europe        | 56  | NR                                                                | NR         | Multiple                  | NS           | MBI                                          | 25.00% | High EE, high DP and low PA |
| Bragard et al, 2010 <sup>29</sup>        | Belgium     | Europe        | 102 | NR                                                                | NR         | Multiple                  | NS           | MBI                                          | NR     | NR                          |
| Bragard et al, 2012 <sup>30</sup>        | Belgium     | Europe        | 113 | Mean: 28, SD: 2.9                                                 | 28 (25.0)  | Multiple                  | 2002 to 2006 | MBI                                          | NR     | NR                          |
| Brant et al, 2010 <sup>31</sup>          | England     | Europe        | 36  | Mean: 25, Range: 23-30                                            | 15 (42)    | NR                        | 2005 to 2007 | MBI                                          | NR     | NR                          |
| Braun et al, 2017 <sup>32</sup>          | USA         | North America | 32  | Mean: 28.59, SD: 2.69                                             | 25 (79)    | Internal Medicine         | 2014         | MBI                                          | 50.00% | High EE or DP               |
| Campbell et al, 2010 <sup>33</sup>       | USA         | North America | 86  | NR                                                                | 44 (51)    | Internal Medicine         | 2003 to 2008 | MBI                                          | 67.00% | High EE or DP               |
| Castelo-Branco et al, 2007 <sup>34</sup> | Spain       | Europe        | 109 | Mean: 27, SD: 2.3                                                 | 15 (14.0)  | Obstetrics and Gynecology | 2004         | MBI                                          | 58.00% | High EE or DP               |
| Chaput et al, 2015 <sup>35</sup>         | France      | Europe        | 52  | Mean: 28.9, Range 25-34                                           | 26 (50)    | Plastic surgery           | 2013         | MBI                                          | 28.80% | High EE or DP               |
| Chati et al, 2017 <sup>36</sup>          | France      | Europe        | 251 | Mean: 29.5, SD: 2.7                                               | 144 (57.5) | General Surgery           | 2013         | MBI                                          | 52.00% | High EE or DP               |
| Chaukos et al, 2017 <sup>37</sup>        | USA         | North America | 54  | NR                                                                | 21 (40)    | Internal Medicine         | NS           | MBI                                          | 31.00% | High EE or DP               |
| Chaukos et al, 2017 <sup>37</sup>        | USA         | North America | 14  | NR                                                                | 6 (40)     | Psychiatry                | NS           | MBI                                          | 14.00% | High EE or DP               |
| Chen et al, 2013 <sup>38</sup>           | Taiwan      | Asia          | 278 | NR                                                                | NR         | Multiple                  | 2012         | MBI                                          | NR     | High EE or DP               |

Appendix to: Naji L, Singh B, Shah A, et al. Global prevalence of burnout among postgraduate medical trainees: a systematic review and meta-regression.

CMAJ Open 2021. DOI:10.9778/cmajo.20200068. Copyright © 2021 The Author(s) or their employer(s).

To receive this resource in an accessible format, please contact us at cmajgroup@cmaj.ca.

|                                          |           |                         |                        |                           |            |                   |             |                                                    |        |                                         |
|------------------------------------------|-----------|-------------------------|------------------------|---------------------------|------------|-------------------|-------------|----------------------------------------------------|--------|-----------------------------------------|
| Choi et al, 2017 <sup>39</sup>           | USA       | North America           | 2011 (507), 2013 (520) | NR                        |            | Multiple          | 2011 & 2013 | Single item measure                                | NR     | NR                                      |
| Cofer et al, 2018 <sup>40</sup>          | USA       | North America           | 40                     | NR                        | 27 (68)    | General Surgery   | 2016        | MBI                                                | 25.00% | 2/3 of high EE, high DP or low PA       |
| Coluccia, et al, 2017 <sup>41</sup>      | Italy     | Europe                  | 41                     | NR                        | 17 (42)    | Psychiatry        | 2016        | MBI                                                | NR     | NR                                      |
| Cooke et al, 2013 <sup>42</sup>          | Australia | Australia & New Zealand | 128                    | NR                        | NR         | General Practice  | 2010        | Single item measure                                | 14.00% | Selecting statements 3-5                |
| Creed et al, 2014 <sup>43</sup>          | Australia | Australia & New Zealand | 355                    | Mean: 28.06, Range: 21-58 | 111 (31.2) | NR                | NR          | Copenhagen Burnout Inventory                       | NR     | NR                                      |
| Cubero et al, 2016 <sup>44</sup>         | Brazil    | South America           | 54                     | NR                        | 29 (54)    | Oncology          | 2010        | MBI                                                | 76.00% | High EE or DP                           |
| Dahlin et al, 2010 <sup>45</sup>         | Sweden    | Europe                  | 186                    | Mean: 27.4, SD: 4         | 75 (40.3)  | NR                | 2003 & 2006 | Oldenburg Burnout Inventory                        | NR     | NR                                      |
| De Andrade et al, 2016 <sup>46</sup>     | Brazil    | South America           | 32                     | NR                        | 7 (22)     | Pediatrics        | 2009        | MBI                                                | 18.80% | High EE and DP                          |
| De Oliveira Jr et al, 2013 <sup>47</sup> | USA       | North America           | 1417                   | NR                        | 808 (57.0) | Anesthesia        | NR          | Modified MBI (12 questions)                        | 41.00% | Moderate or high in 2/3 of EE, DP or PA |
| Demirci et al, 2010 <sup>48</sup>        | Turkey    | Asia                    | 11                     | NR                        | NR         | NR                | 2006        | MBI                                                | NR     | High EE or DP                           |
| Dikmetas et al, 2011 <sup>49</sup>       | Turkey    | Asia                    | 270                    | Mean: 30, SD/Range: NR    | 178 (65.9) | Multiple          | 2009        | MBI                                                | NR     | High EE or DP or low PA                 |
| Dominguez et al, 2018 <sup>50</sup>      | Colombia  | South America           | 202                    | Mean: 28.63, SD: 2.96     | 129 (63.9) | NR                | 2015        | MBI                                                | 33.20% | High EE and 1 of high DP or low PA)     |
| Doolittle et al, 2013 <sup>51</sup>      | USA       | North America           | 108                    | Mean: 30, SD: 4.8         | 54 (50.0)  | Multiple          | 2010        | MBI                                                | NR     | NR                                      |
| Durning et al, 2013 <sup>52</sup>        | USA       | North America           | 17                     | Mean: 29.6, SD: 2         | 10 (59)    | Internal Medicine | NR          | Modified MBI (2-Single Item Measures of EE and DP) | NR     | NR                                      |
| Dyrbye et al, 2014 <sup>53</sup>         | USA       | North America           | 1701                   | NR                        | 827 (48.6) | Multiple          | 2012        | MBI                                                | 60.30% | High EE or DP                           |
| Elmore et al, 2016 <sup>54</sup>         | USA       | North America           | 665                    | Mean: 30.3, SD: 3.3       | 375 (56.4) | General Surgery   | 2014        | MBI                                                | 69.00% | High EE or DP or low PA                 |
| Embriaco et al, 2007 <sup>55</sup>       | France    | Europe                  | 372                    | NR                        | NR         | NR                | 2004        | MBI                                                | 42.70% | Total score between -8 to +34           |
| Fahrenkopf et al, 2008 <sup>56</sup>     | USA       | North America           | 123                    | NR                        | 37 (30.0)  | NR                | 2003        | MBI                                                | 75.00% | High EE and DP                          |
| Ferreira et al, 2012 <sup>57</sup>       | Brazil    | South America           | 12                     | NR                        | NR         | NR                | 2011        | Burnout Syndrome Inventory                         | NR     | NR                                      |
| Fulop et al, 2011 <sup>58</sup>          | Hungary   | Europe                  | 67                     | Mean: 31.45, SD: 5.79     | 16 (24)    | NR                | 2011        | MBI                                                | NR     | NR                                      |

Appendix to: Naji L, Singh B, Shah A, et al. Global prevalence of burnout among postgraduate medical trainees: a systematic review and meta-regression.

*CMAJ Open* 2021. DOI:10.9778/cmajo.20200068. Copyright © 2021 The Author(s) or their employer(s).

To receive this resource in an accessible format, please contact us at [cmajgroup@cmaj.ca](mailto:cmajgroup@cmaj.ca).

|                                         |                |               |      |                          |             |                                                         |              |                             |        |                                   |
|-----------------------------------------|----------------|---------------|------|--------------------------|-------------|---------------------------------------------------------|--------------|-----------------------------|--------|-----------------------------------|
| Galam et al, 2013 <sup>59</sup>         | France         | Europe        | 4050 | Mean: 26.4, SD: NR       | 1268 (31.3) | General Practice                                        | 2011         | MBI                         | 24.10% | 2/3 of high EE, high DP or low PA |
| Garza et al, 2004 <sup>60</sup>         | USA            | North America | 136  | NR                       | 39 (29.0)   | Obstetrics and Gynecology                               | NR           | MBI                         | 18.00% | High EE, DP and low PA            |
| Geelan-Hansen et al, 2018 <sup>61</sup> | USA            | North America | 14   | NR                       | NR          | NR                                                      | NR           | MBI                         | NR     | NR                                |
| Gelfand et al, 2004 <sup>62</sup>       | USA            | North America | 26   | NR                       | NR          | Gen surg (and some off service PGY1 surgical residents) | 2003         | MBI                         | NR     | High EE, high DP and low PA       |
| Goitein et al, 2005 <sup>63</sup>       | USA            | North America | 118  | NR                       | 55 (47.0)   | Internal Medicine                                       | 2004         | MBI                         | 68.00% | High EE or DP                     |
| Golub et al, 2007 <sup>64</sup>         | USA            | North America | 514  | Mean: 31, Range: 24-45   | 406 (79.0)  | Otolaryngology                                          | 2005         | MBI                         | 10.00% | High EE, high DP and low PA       |
| Gopal et al, 2005 <sup>65</sup>         | USA            | North America | 121  | NR                       | 58 (48.0)   | Internal Medicine                                       | 2003         | MBI                         | 61.00% | High EE or DP                     |
| Gopal et al, 2007 <sup>66</sup>         | USA            | North America | 106  | NR                       | 45 (42.5)   | Internal medicine                                       | 2004         | MBI                         | 55.00% | High EE or DP                     |
| Gouveia et al, 2017 <sup>67</sup>       | Brazil         | South America | 129  | NR                       | 62 (48.1)   | Multiple                                                | 2015         | MBI                         | 27.90% | High EE, high DP and low PA       |
| Govardhan et al, 2012 <sup>68</sup>     | USA            | North America | 49   | Mean: 30.1, SD: 3        | 4 (9)       | Obstetrics and Gynecology                               | 2009         | MBI                         | 13.00% | High EE, high DP and low PA       |
| Goveia et al, 2018 <sup>69</sup>        | Brazil         | South America | 37   | Mean: 30, SD: 2.9        | NR          | Anesthesia                                              | 2014 to 2015 | MBI                         | 2.70%  | High EE, high DP and low PA       |
| Guenette et al, 2017 <sup>70</sup>      | USA            | North America | 94   | NR                       | 59 (63)     | Radiology                                               | 2016         | MBI                         | NR     | High EE, high DP and low PA       |
| Guenette et al, 2018 <sup>71</sup>      | USA            | North America | 314  | Mean: 31.1, SD: 2.8      | 217 (69.0)  | Radiology                                               | 2017         | MBI                         | NR     | Low PA                            |
| Gulen et al, 2016 <sup>72</sup>         | Turkey         | Asia          | 48   | Mean: 30.5, SD: 3.2      | 26 (55)     | Emergency Medicine                                      | 2015         | MBI                         | NR     | NR                                |
| Guthrie et al, 1999 <sup>73</sup>       | England        | Europe        | 64   | NR                       | 31 (48)     | Psychiatry                                              | NR           | MBI                         | NR     | High EE, high DP and low PA       |
| Halliday et al, 2017 <sup>74</sup>      | United Kingdom | Europe        | 292  | HST 33, JST 28           | 128 (43.8)  | NR                                                      | NR           | Oldenburg Burnout Inventory | NR     | NR                                |
| Hameed et al, 2018 <sup>75</sup>        | Saudi Arabia   | ME & NA       | 181  | Mean: 27.6, SD/Range: NR | 75 (41.4)   | Multiple                                                | 2013 to 2014 | MBI                         | 80.70% | High EE or DP                     |
| Hannan et al, 2018 <sup>76</sup>        | Ireland        | Europe        | 101  | Mean: 28, Range: 23-43   | 45 (44.4)   | NR                                                      | 2012 to 2014 | MBI                         | NR     | NR                                |
| Hausler et al, 2017 <sup>77</sup>       | Austria        | Europe        | 136  | Mean: 32, SD: 4.8        | 47 (34.6)   | Multiple                                                | 2015 to 2016 | Modified MBI (21 items)     | NR     | NR                                |

Appendix to: Naji L, Singh B, Shah A, et al. Global prevalence of burnout among postgraduate medical trainees: a systematic review and meta-regression.

*CMAJ Open* 2021. DOI:10.9778/cmajo.20200068. Copyright © 2021 The Author(s) or their employer(s).

To receive this resource in an accessible format, please contact us at [cmajgroup@cmaj.ca](mailto:cmajgroup@cmaj.ca).

|                                     |              |                         |      |                      |            |                    |              |                                                    |        |                             |
|-------------------------------------|--------------|-------------------------|------|----------------------|------------|--------------------|--------------|----------------------------------------------------|--------|-----------------------------|
| Henning et al, 2014 <sup>78</sup>   | New Zealand  | Australia & New Zealand | 17   | NR                   | 6 (35)     | NR                 | NR           | Copenhagen Burnout Inventory                       | NR     | NR                          |
| Hill et al, 2009 <sup>79</sup>      | USA          | North America           | 22   | NR                   | NR         | Otolaryngology     | 2006         | MBI                                                | 31.82% | High EE and DP              |
| Hillhouse et al, 2000 <sup>80</sup> | USA          | North America           | 46   | Mean: 30.6, SD: 4.7  | 31 (67)    | Multiple           | nr           | Staff Burnout Scale for Health Professionals       | NR     | NR                          |
| Holmes et al, 2017 <sup>81</sup>    | USA          | North America           | 276  | NR                   | 97 (35.0)  | Multiple           | 2014         | MBI                                                | 69.00% | High EE or DP               |
| Huggard et al, 2011 <sup>82</sup>   | New Zealand  | Australia & New Zealand | 253  | Mean: 31.1, SD: 5.9  | 104 (41.1) | Multiple           | NR           | Professional Quality of Life Index Version 3       | 19.50% | NR                          |
| Hutter et al, 2006 <sup>83</sup>    | USA          | North America           | 58   | NR                   | NR         | Multiple           | 2013 & 2014  | MBI                                                | NR     | NR                          |
| Hwang et al, 2018 <sup>84</sup>     | USA          | North America           | 45   | NR                   | 39 (87)    | Orthopedic Surgery | 2,011        | MBI                                                | NR     | High EE and DP and low PA   |
| Hyman et al, 2011 <sup>85</sup>     | USA          | North America           | 34   | NR                   | 20 (59)    | Multiple           | 2007         | Modified MBI NS                                    | NR     | High EE, high DP and low PA |
| Jamjoom et al, 2018 <sup>86</sup>   | Saudi Arabia | ME & NA                 | 32   | NR                   | 2 (6)      | Pediatrics         | 2016         | MBI                                                | 70.00% | NR                          |
| Jin et al, 2015 <sup>87</sup>       | China        | Asia                    | 135  | NR                   | 66 (48.9)  | NR                 | 2008         | MBI-GS                                             | NR     | NR                          |
| Joaquim et al, 2018 <sup>88</sup>   | Portugal     | Europe                  | 115  | Mean: 28.4, SD: 2.2  | 30 (26.3)  | Oncology           | 2011         | MBI                                                | 45.20% | NR                          |
| Jovanovic et al, 2016 <sup>89</sup> | Europe       | Europe                  | 1980 | Mean: 31.9, SD: 5.3  | 804 (40.6) | Psychiatry         | 2008 to 2012 | MBI-GS                                             | 36.70% | High MBI-EX and MBI-CY      |
| Kang et al, 2013 <sup>90</sup>      | South Korea  | Asia                    | 86   | NR                   | 64 (74)    | NR                 | 2010         | MBI                                                | NR     | NR                          |
| Karaoglu et al, 2015 <sup>91</sup>  | Turkey       | Asia                    | 74   | Mean: 27.6, SD: 2.25 | 28 (41)    | Multiple           | 2011         | Modified MBI (21 items)                            | NR     | NR                          |
| Kash et al, 2000 <sup>92</sup>      | USA          | North America           | 76   | NR                   | 53 (70)    | Oncology           | NS           | MBI                                                | NR     | NR                          |
| Kassam et al, 2015 <sup>93</sup>    | Canada       | North America           | 301  | Mean: 30.9, SD: 4.3  | 119 (39.4) | NR                 | 2012         | Copenhagen Burnout Inventory                       |        | NR                          |
| Kealy et al, 2016 <sup>94</sup>     | Canada       | North America           | 400  | NR                   | 123 (30.8) | Psychiatry         | 2014         | Single item measure                                | 21.00% | Self-report                 |
| Kolarik et al, 2018 <sup>95</sup>   | USA          | North America           | 161  | Mean: 29.6, SD: 2.9  | 83 (51.6)  | Multiple           | 2017         | Modified MBI (2-Single Item Measures of EE and DP) | NR     | NR                          |
| Komur et al, 2017 <sup>96</sup>     | Turkey       | Asia                    | 54   | NR                   | NR         | Pathology          | NS           | MBI                                                | NR     | NR                          |
| Krug et al, 2017 <sup>97</sup>      | USA          | North America           | 112  | NR                   | 47 (42)    | Internal Medicine  | 2012         | MBI                                                | 61.00% | High EE or DP               |

Appendix to: Naji L, Singh B, Shah A, et al. Global prevalence of burnout among postgraduate medical trainees: a systematic review and meta-regression.

*CMAJ Open* 2021. DOI:10.9778/cmajo.20200068. Copyright © 2021 The Author(s) or their employer(s).

To receive this resource in an accessible format, please contact us at [cmajgroup@cmaj.ca](mailto:cmajgroup@cmaj.ca).

|                                      |                        |                         |     |                          |            |                   |              |                                                       |        |                             |
|--------------------------------------|------------------------|-------------------------|-----|--------------------------|------------|-------------------|--------------|-------------------------------------------------------|--------|-----------------------------|
| Kwah et al, 2016 <sup>98</sup>       | USA                    | North America           | 32  | NR                       | NR         | Internal Medicine | 2012         | MBI                                                   | 75.00% | High EE or DP               |
| Lambden et al, 2018 <sup>99</sup>    | USA                    | North America           | 72  | NR                       | NR         | Multiple          | 2017         | Single item measure                                   | 53.50% | >=3 on single-item question |
| Landrigan et al, 2008 <sup>100</sup> | USA                    | North America           | 213 | 30.2                     | 62 (29.3)  | Pediatrics        | 2003 & 2004  | MBI                                                   | 75.40% | High EE or DP               |
| Landrigan et al, 2008 <sup>100</sup> | USA                    | North America           | 213 | 29.1                     | 68 (31.7)  | Pediatrics        | 2003 & 2004  | MBI                                                   | 57.00% | High EE or DP               |
| Leach et al, 2018 <sup>101</sup>     | USA                    | North America           | 43  | NR                       | 27 (63)    | General Surgery   | 2017         | Single item measure                                   | 30.20% | >=3                         |
| Lebares et al, 2018 <sup>102</sup>   | USA                    | North America           | 566 | NR                       | 277 (49.0) | General Surgery   | 2016         | Modified MBI (9 items)                                | 68.95% | High EE or DP or low PA     |
| Lebensohn et al, 2013 <sup>103</sup> | USA                    | North America           | 168 | Median: 29.0, IQR: NR    | 67 (40.1)  | Family Medicine   | 2012 to 2013 | MBI                                                   | NR     | NR                          |
| Lee et al, 2018 <sup>104</sup>       | Singapore              | Asia                    | 446 | Mean: 29.4, SD: 2.6      | 208 (46.6) | Multiple          | 2015         | MBI                                                   | 80.70% | High EE, DP or low PA       |
| Lemkau, 1987 <sup>105</sup>          | USA                    | North America           | 67  | Mean: 29.1, SD: 3.8      | 53 (79)    | General Practice  | 1984         | MBI                                                   | NR     | NR                          |
| Leung et al, 2017 <sup>106</sup>     | Australia, New Zealand | Australia & New Zealand | 107 | Median: 31.4, IQR: NR    | 54 (50.0)  | Oncology          | 2015         | MBI                                                   | 49.50% | High EE or DP               |
| Levin et al, 2017 <sup>107</sup>     | USA                    | North America           | 354 | Mean: 33, SD: 4          | 182 (51.4) | Neurology         | 2016         | MBI                                                   | 67.20% | High EE or DP               |
| Lin et al, 2016 <sup>108</sup>       | USA                    | North America           | 73  | Mean: 30.8, SD: 3.22     | 42 (58)    | General Surgery   | 2013 to 2014 | MBI                                                   | 82.00% | High EE or DP               |
| Lindeman et al, 2013 <sup>109</sup>  | USA                    | North America           | 30  | Mean: 30, Range: 25-36   | 21 (70)    | General Surgery   | 2011         | MBI                                                   | 93.00% | >=13                        |
| Lindeman et al, 2013 <sup>109</sup>  | USA                    | North America           | 36  | Mean: 30, Range: 25-36   | 24 (67)    | General Surgery   | 2012         | MBI                                                   | 75.00% | >=13                        |
| Lindeman et al, 2017 <sup>110</sup>  | USA                    | North America           | 88  | NR                       | 46 (52)    | General Surgery   | 2016         | MBI                                                   | 51.00% | High EE                     |
| Llera et al, 2014 <sup>111</sup>     | Argentina              | South America           | 92  | NR                       | 28 (30)    | Multiple          | 2011         | MBI                                                   | 19.60% | High EE and DP and low PA   |
| Low et al, 2018 <sup>112</sup>       | Singapore              | Asia                    | 43  | Median: 25, Range: 25-27 | 18 (43)    | Multiple          | 2015         | Professional Quality of Life Scale                    | 34.88% | >=57                        |
| Lue et al, 2010 <sup>113</sup>       | Taiwan                 | Asia                    | 555 | Mean: 29.35, SD: 2.58    | 376 (67.7) | Multiple          | 2007         | Copenhagen Burnout Inventory                          |        | NR                          |
| Malik et al, 2016 <sup>114</sup>     | Pakistan               | Asia                    | 133 | NR                       | 98 (73.7)  | Multiple          | NS           | MBI                                                   | 57.90% | High in 2 of EE, DP or PA   |
| Markwell et al, 2009 <sup>115</sup>  | Australia, New Zealand | Australia & New Zealand | 914 | NR                       | 402 (44.0) | Multiple          | 2008         | Professional Quality of Life Scale                    | 69.00% | NR                          |
| Martini et al, 2004 <sup>116</sup>   | USA                    | North America           | 110 | NR                       | NR         | Multiple          | 2003         | MBI                                                   | 49.00% | NR                          |
| Martini et al, 2006 <sup>117</sup>   | USA                    | North America           | 118 | NR                       | NR         | Multiple          | 2004         | MBI                                                   | 41.00% | NR                          |
| McNeeley et al, 2013 <sup>118</sup>  | USA                    | North America           | 249 | Mean: 31, Range: 25-46   | 182 (73.0) | Radiology         | 2012         | Modified MBI (2 Single Item Measures, & PA (5 items)) | 62.00% | High EE or DP               |

Appendix to: Naji L, Singh B, Shah A, et al. Global prevalence of burnout among postgraduate medical trainees: a systematic review and meta-regression.

*CMAJ Open* 2021. DOI:10.9778/cmajo.20200068. Copyright © 2021 The Author(s) or their employer(s).

To receive this resource in an accessible format, please contact us at [cmajgroup@cmaj.ca](mailto:cmajgroup@cmaj.ca).

|                                         |                 |                         |     |                          |            |                   |      |                                                       |        |                                                         |
|-----------------------------------------|-----------------|-------------------------|-----|--------------------------|------------|-------------------|------|-------------------------------------------------------|--------|---------------------------------------------------------|
| Michels et al, 2003 <sup>119</sup>      | USA             | North America           | 350 | Mean: 30.4, SD: 5.2      | 238 (68.0) | General Practice  | 1993 | MBI                                                   | NR     | NR                                                      |
| Miyoshi et al, 2016 <sup>120</sup>      | Japan           | Asia                    | 85  | Mean: 26.24, SD: 3.81    | 47 (55)    | NR                | 2013 | MBI-GS                                                | 30.59% | High EE and 1 of high DP or low PA                      |
| Mohammed et al, 2014 <sup>121</sup>     | Egypt           | ME & NA                 | 84  | NR                       | 46 (55)    | Multiple          | 2012 | MBI                                                   | 76.00% | 2/3 of high EE, high DP or low PA                       |
| Moloney et al, 2000 <sup>122</sup>      | New Zealand     | Australia & New Zealand | 99  | NR                       | 52 (52)    | Psychiatry        | 1997 | MBI                                                   | NR     | NR                                                      |
| Mordant et al, 2014 <sup>123</sup>      | Europe          | Europe                  | 155 | Mean: 34.6, SD: 8.2      | 103 (66.5) | Multiple          | 2010 | Modified MBI (2-Single Item Measures of EE and DP)    | 24.80% | "Once a week or less" response to at least one question |
| Msaouel et al, 2010 <sup>124</sup>      | Greece          | Europe                  | 311 | Median: 32, Range: 26-45 | 172 (55.3) | Multiple          | NR   | MBI                                                   | 49.50% | High EE and 1 of high DP or low PA)                     |
| Myszkowski et al, 2017 <sup>125</sup>   | France          | Europe                  | 259 | Mean: 25.6, SD/Range: NR | 60 (23.2)  | Internal Medicine | NR   | MBI                                                   | NR     | NR                                                      |
| Nolan et al, 2017 <sup>126</sup>        | Canada          | North America           | 166 | Median: 27.5, IQR: 4.0   | 43 (26.0)  | Pediatrics        | 2014 | MBI                                                   | 42.00% | High EE or DP                                           |
| O'Connor et al, 2017 <sup>127</sup>     | Ireland         | Europe                  | 172 | NR                       | 75 (43.6)  | Multiple          | 2015 | MBI                                                   | 69.50% | High EE or DP                                           |
| Ogundipe et al, 2014 <sup>128</sup>     | Nigeria         | Africa                  | 204 | Mean: 33.44, SD: 4.5     | 119 (58.3) | Multiple          |      | MBI                                                   | NR     | High EE and DP and low PA                               |
| Okpozo et al, 2017 <sup>129</sup>       | USA             | North America           | 203 | NR                       | 105 (51.7) | Multiple          | NR   | MBI                                                   | NR     | NR                                                      |
| Olson et al, 2014 <sup>130</sup>        | USA             | North America           | 76  | Mean: 29.2, SD: 2.9      | 40 (53)    | Internal Medicine | 2012 | MBI                                                   | 53.90% | High EE or DP                                           |
| Olson et al, 2015 <sup>131</sup>        | USA             | North America           | 45  | Mean: 28.4, SD: 1.7      | 16 (36)    | Pediatrics        | 2014 | MBI                                                   | 40.00% | High EE or DP or low PA                                 |
| Panagoulou et al, 2006 <sup>132</sup>   | Greece          | Europe                  | 141 | Mean: 32, SD: 5          | 78 (55.0)  | Internal medicine | 2004 | MBI                                                   | NR     | High EE and DP                                          |
| Pantaleoni et al, 2014 <sup>133</sup>   | USA             | North America           | 61  | NR                       | NR         | Pediatrics        | 2011 | MBI                                                   | 46.00% | High EE or DP                                           |
| Park et al, 2016 <sup>134</sup>         | Korea           | Asia                    | 317 | Mean: 30.44, SD: 2.98    | 214 (67.5) | Multiple          | 2013 | MBI                                                   | NR     | NR                                                      |
| Parr et al, 2016 <sup>135</sup>         | Australia       | Australia & New Zealand | 153 | NR                       | 68 (44.4)  | Multiple          | NR   | Copenhagen Burnout Inventory                          | NR     | >= 50                                                   |
| Pereira-Lima et al, 2015 <sup>136</sup> | Brazil          | South America           | 305 | Mean: 28, SD: 2.53       | 159 (52.1) | Multiple          | NR   | Burnout Syndrome Inventory                            | 58.36% | EE+ED or DH                                             |
| Porrino et al, 2017 <sup>137</sup>      | USA             | North America           | 58  | NR                       | 48 (83)    | Radiology         | 2016 | Modified MBI (2 Single Item Measures, & PA (5 items)) | 87.90% | High EE or DP or low PA                                 |
| Prins et al, 2007 <sup>138</sup>        | The Netherlands | Europe                  | 158 | Mean: 31.9, SD: 3.2      | 76 (48.0)  | Multiple          | 2003 | Modified MBI (20 items)                               | 13.00% | Moderate: >19.92 EE + >7.95                             |

Appendix to: Naji L, Singh B, Shah A, et al. Global prevalence of burnout among postgraduate medical trainees: a systematic review and meta-regression.

*CMAJ Open* 2021. DOI:10.9778/cmajo.20200068. Copyright © 2021 The Author(s) or their employer(s).

To receive this resource in an accessible format, please contact us at [cmajgroup@cmaj.ca](mailto:cmajgroup@cmaj.ca).

|                                       |                        |                         |      |                        |            |                   |      |                                              |                                           |                                                                                        |
|---------------------------------------|------------------------|-------------------------|------|------------------------|------------|-------------------|------|----------------------------------------------|-------------------------------------------|----------------------------------------------------------------------------------------|
|                                       |                        |                         |      |                        |            |                   |      |                                              |                                           | (women) or >8.95 (men) on DP. OR >19.92EE and >25.97 PA                                |
| Prins et al, 2010 <sup>139</sup>      | The Netherlands        | Europe                  | 2115 | Mean: 31.5, SD: 3.5    | 820 (38.8) | Multiple          | 2005 | Modified MBI (20 items)                      | 21.00%                                    | Moderate: >=19.92 EE + >7.95 (women) or >8.95 (men) on DP. OR >=19.92EE and <=25.97 PA |
| Purdy et al, 1987 <sup>140</sup>      | USA                    | North America           | 67   | Mean: 29.1, SD: 3.8    | 53 (79)    | General Practice  | 1984 | MBI                                          | NR                                        | NR                                                                                     |
| Racic et al, 2018 <sup>141</sup>      | Bosnia and Herzegovina | Europe                  | 26   | NR                     | NR         | General Practice  | 2014 | Professional Quality of Life Index Version 5 | NR                                        | low <=22, moderate 23-41, high>=42                                                     |
| Ramey et al, 2017 <sup>142</sup>      | USA                    | North America           | 205  | NR                     | 141 (68.8) | Oncology          | 2016 | MBI                                          | 33.20%                                    | High EE or DP                                                                          |
| Ratnakaran et al, 2016 <sup>143</sup> | India                  | Asia                    | 558  | NR                     | 326 (58.4) | Multiple          | NR   | Copenhagen Burnout Inventory                 | NR; burnout in 3 diff categories reported | 50/100 score cutoff for high/low                                                       |
| Raviola et al, 2002 <sup>144</sup>    | Kenya                  | Africa                  | 50   | Mean: 33, SD/Range: NR | NR         | Multiple          | NS   | Single item measure                          | 82.00%                                    | Self-report                                                                            |
| Ringrose et al, 2009 <sup>145</sup>   | Netherlands            | Europe                  | 47   | Mean: 30.3, SD: 3.3    | 23 (49)    | Multiple          | 2007 | Modified MBI (15 items)                      | 31.00%                                    | High EE and 1 of high DP or low PA)                                                    |
| Ripp et al, 2010 <sup>146</sup>       | USA                    | North America           | 145  | NR                     | 73 (50.3)  | Internal Medicine | 2007 | MBI                                          | 34.00%                                    | High EE or DP                                                                          |
| Ripp et al, 2011 <sup>147</sup>       | USA                    | North America           | 191  | Mean: 28, SD/Range: NR | 126 (66.0) | Internal Medicine | 2009 | MBI                                          | 81.00%                                    | High EE or DP                                                                          |
| Ripp et al, 2015 <sup>148</sup>       | USA                    | North America           | 133  | NR                     | 77 (58.0)  | Internal Medicine | 2012 | MBI                                          | 75.00%                                    | High EE or DP                                                                          |
| Robertson et al, 2017 <sup>149</sup>  | USA                    | North America           | 340  | NR                     | 143 (42.0) | Multiple          | 2015 | Single item measure                          | 34.00%                                    | burnout was considered positive if respondent selected choice 3,4, or 5                |
| Rogers et al, 2014 <sup>150</sup>     | Australia              | Australia & New Zealand | 349  | Mean: 28, SD: 4.4      | 108 (31.0) | NR                | 2011 | Copenhagen Burnout Inventory                 | NR                                        | NR                                                                                     |
| Rogers et al, 2016 <sup>151</sup>     | Canada                 | North America           | 198  | NR                     | 55 (27.8)  | Multiple          | 2014 | Copenhagen Burnout Inventory                 | NR                                        | NR                                                                                     |
| Rosen et al, 2006 <sup>152</sup>      | USA                    | North America           | 47   | NR                     | 23 (49)    | Internal Medicine | 2003 | MBI                                          | 55.30%                                    | High EE and DP                                                                         |

Appendix to: Naji L, Singh B, Shah A, et al. Global prevalence of burnout among postgraduate medical trainees: a systematic review and meta-regression.

*CMAJ Open* 2021. DOI:10.9778/cmajo.20200068. Copyright © 2021 The Author(s) or their employer(s).

To receive this resource in an accessible format, please contact us at [cmajgroup@cmaj.ca](mailto:cmajgroup@cmaj.ca).



|                                         |                     |               |      |                           |            |                                |      |                                                    |        |                                 |
|-----------------------------------------|---------------------|---------------|------|---------------------------|------------|--------------------------------|------|----------------------------------------------------|--------|---------------------------------|
| Rui et al, 2016 <sup>153</sup>          | China               | Asia          | 149  | NR                        | NR         | Anesthesia                     | NS   | MBI                                                | NR     | High EE, high DP and low PA     |
| Ruitenburng et al, 2012 <sup>154</sup>  | Netherlands         | Europe        | 181  | Mean: 33, SD: 3.2         | 76 (42.0)  | Multiple                       | 2009 | Modified MBI (13 items)                            | 7.00%  | High EE and DP                  |
| Sajjadi et al, 2017 <sup>155</sup>      | Canada              | North America | 43   | Mean: 30, SD: 3           | 19 (45)    | IM                             | 2014 | MBI                                                | 21.00% | High EE and DP and low PA       |
| Salles et al, 2014 <sup>156</sup>       | USA                 | North America | 141  | Mean: 31.25, SD/Range: NR | 89 (63.0)  | Multiple                       | NR   | MBI                                                | NR     | NR                              |
| Salpigktidis et al, 2016 <sup>157</sup> | Greece, UK, Germany | Europe        | 131  | Mean: 30, SD: 3           | 66 (50.0)  | Multiple                       | 2016 | MBI                                                | NR     | NR                              |
| Sargent et al, 2004 <sup>158</sup>      | USA                 | North America | 21   | Mean: 30, Range: 28-34    | 20 (97)    | Orthopedic Surgery             | NR   | MBI                                                | NR     | NR                              |
| Sargent et al, 2009 <sup>159</sup>      | USA                 | North America | 384  | NR                        | 338 (88.0) | Orthopedic Surgery             | NR   | MBI                                                | 56.00% | NR                              |
| Satterfield et al, 2009 <sup>160</sup>  | USA                 | North America | 28   | NR                        | 9 (32)     | Internal Medicine              |      | Tedium index                                       | NR     | NR                              |
| Schweitzer, 1994 <sup>161</sup>         | South Africa        | Africa        | 36   | NR                        | NR         | NR                             | NR   | Single item measure                                | 55.50% | Yes                             |
| See et al, 2016 <sup>162</sup>          | Singapore           | Asia          | 64   | NR                        | NR         | Internal Medicine              | 2013 | Copenhagen Burnout Inventory                       | 71.80% | Score of 50/100 on any subscale |
| Selic et al, 2012 <sup>163</sup>        | Slovenia            | Europe        | 117  | Mean: 34.2, SD: 4.6       | 21 (17.9)  | General Practice               | 2009 | MBI                                                | NR     | NR                              |
| Shakir et al, 2017 <sup>164</sup>       | USA                 | North America | 255  | NR                        | 205 (80.4) | Neurosurgery                   | 2016 | Modified MBI (9 items)                             | 36.50% | High EE or DP                   |
| Shams and El-Masry, 2013 <sup>165</sup> | Egypt               | ME & NA       | 30   | NR                        | NR         | Anesthesia                     | 2011 | MBI                                                | NR     | High EE, DP and low PA          |
| Shanafelt et al, 2002 <sup>166</sup>    | USA                 | North America | 115  | NR                        | 54 (47.0)  | Internal Medicine              | 2001 | MBI                                                | 76.00% | High EE or DP                   |
| Shanafelt et al, 2014 <sup>167</sup>    | USA                 | North America | 1345 | Median: 33, IQR: NR       | 710 (52.8) | Oncology                       | 2014 | Modified MBI (2-Single Item Measures of EE and DP) | 34.10% | High EE or DP                   |
| Shapiro et al, 2017 <sup>168</sup>      | USA                 | North America | 217  | NR                        | 178 (82.0) | Oral and Maxillofacial Surgery | NS   | MBI                                                | NR     | NR                              |
| Shoimer et al, 2018 <sup>169</sup>      | Canada              | North America | 96   | NR                        | NR         | Dermatology                    | 2014 | MBI                                                | NR     | NR                              |
| Simpkin et al, 2018 <sup>170</sup>      | US and Canada       | North America | 49   | NR                        | 15 (30)    | Pediatrics                     | 2015 | Modified MBI (2-Single Item Measures of EE and DP) | 31.00% | High EE or DP                   |
| Siu et al, 2012 <sup>171</sup>          | Hong Kong           | Asia          | 77   | NR                        | NR         | NR                             | 2009 | MBI                                                | 48.00% | High EE and DP and low PA       |
| Sochos et al, 2012 <sup>172</sup>       | England             | Europe        | 184  | Mean: 30.6, SD: 4.4       | 73 (40.0)  | Multiple                       | NS   | MBI                                                | NR     | NR                              |

Appendix to: Naji L, Singh B, Shah A, et al. Global prevalence of burnout among postgraduate medical trainees: a systematic review and meta-regression.

*CMAJ Open* 2021. DOI:10.9778/cmajo.20200068. Copyright © 2021 The Author(s) or their employer(s).

To receive this resource in an accessible format, please contact us at [cmajgroup@cmaj.ca](mailto:cmajgroup@cmaj.ca).

|                                             |              |               |      |                              |            |                    |      |                                                    |        |                                                                                  |
|---------------------------------------------|--------------|---------------|------|------------------------------|------------|--------------------|------|----------------------------------------------------|--------|----------------------------------------------------------------------------------|
| Spataro et al, 2016 <sup>173</sup>          | USA          | North America | 198  | Mean: 29.9, Range: 25.9-41.5 | 101 (51.0) | Internal Medicine  | 2014 | MBI                                                | 22.00% | High EE or DP                                                                    |
| Stodel et al, 2011 <sup>174</sup>           | South Africa | Africa        | 22   | Mean: 30, SD: 3.26           | 6 (25)     | NR                 | 2009 | MBI                                                | NR     | NR                                                                               |
| Sulaiman et al, 2017 <sup>175</sup>         | Ireland      | Europe        | 265  | Mean: 28.5, SD: 0.26         | 140 (52.8) | Multiple           | NS   | MBI                                                | 26.40% | 2/3 of high EE, high DP or low PA                                                |
| Swami et al, 2013 <sup>176</sup>            | India        | Asia          | 56   | Mean: 27.8, SD: 2.37         | NR         | Multiple           | NR   | Shirom-Milam Burnout Measure                       | NR     | NR                                                                               |
| Talih et al, 2016 <sup>177</sup>            | Lebanon      | ME & NA       | 118  | NR                           | 62 (53.0)  | Multiple           | 2013 | Burnout Measure (modified)                         | 27.00% | >=3.5                                                                            |
| Toral-Villanueva et al, 2009 <sup>178</sup> | Mexico       | North America | 312  | Mean: 28, SD: 2.5            | 178 (57.0) | Multiple           | 2003 | MBI                                                | 40.00% | High EE or DP                                                                    |
| Torppa et al, 2015 <sup>179</sup>           | Finland      | Europe        | 97   | NR                           | NR         | General Practice   | 2011 | Modified MBI (1 item)                              | 16.50% | High EE                                                                          |
| Trockel et al, 2018 <sup>180</sup>          | USA          | North America | 185  | NR                           | NR         | Multiple           | NS   | Modified MBI (2-Single Item Measures of EE and DP) | 50.00% | NR                                                                               |
| Turgut et al, 2016 <sup>181</sup>           | Turkey       | Asia          | 127  | Mean: 28.01, 2.41            | 56 (44.1)  | NR                 | NS   | MBI                                                | NR     | NR                                                                               |
| Tzischinsky et al, 2001 <sup>182</sup>      | Israel       | ME & NA       | 78   | M/F 30.7/30.3                | 53 (68)    | NR                 | NR   | MBI                                                | NR     | NR                                                                               |
| van der Wal et al, 2016 <sup>183</sup>      | Netherlands  | Europe        | 141  | Mean: 31, Range: 26-48       | 53 (37.6)  | Anesthesia         | 2012 | Modified MBI (20 items)                            | 11.30% | High EE and 1 of high DP or low PA                                               |
| van Vendelo et al, 2014 <sup>184</sup>      | Netherlands  | Europe        | 105  | NR                           | 83 (79.0)  | Orthopedic Surgery | 2011 | Modified MBI (2-Single Item Measures of EE and DP) | 27.60% | High EE or DP                                                                    |
| van Vendeloo et al, 2018 <sup>185</sup>     | Belgium      | Europe        | 236  | Median: 28, Range: 26-40     | 96 (40.7)  | Multiple           | 2016 | Modified MBI (20 items)                            | 41.50% | Mean EE >=2.5 AND DP >=1.8 (men) or >=1.6 (women) OR ...EE >=2.5 and <=3.7 on PA |
| van Vendeloo et al, 2018 <sup>186</sup>     | Netherlands  | Europe        | 1231 | Median: 32, Range: 26-40     | 325 (26.4) | Multiple           | 2015 | Modified MBI (20 items)                            | 15.00% | Mean EE >=2.5 AND DP >=1.8 (men) or >=1.6 (women) OR ...EE >=2.5 and <=3.7 on PA |

Appendix to: Naji L, Singh B, Shah A, et al. Global prevalence of burnout among postgraduate medical trainees: a systematic review and meta-regression.

CMAJ Open 2021. DOI:10.9778/cmajo.20200068. Copyright © 2021 The Author(s) or their employer(s).

To receive this resource in an accessible format, please contact us at [cmajgroup@cmaj.ca](mailto:cmajgroup@cmaj.ca).

|                                          |           |                         |     |                       |            |                           |              |     |        |                                    |
|------------------------------------------|-----------|-------------------------|-----|-----------------------|------------|---------------------------|--------------|-----|--------|------------------------------------|
| Waheed et al, 2017 <sup>187</sup>        | Pakistan  | Asia                    | 102 | Mean: 27.45, SD: 1.69 | NR         | Obstetrics and Gynecology | 2016         | MBI | NR     | High EE or DP                      |
| Waldman et al, 2009 <sup>188</sup>       | Argentina | Europe                  | 106 | Mean: 29.1, SD: 2.4   | 73 (68.7)  | Cardiology                | 2007         | MBI | 80.20% | High EE or DP                      |
| Weigl et al, 2015 <sup>189</sup>         | Germany   | Europe                  | 39  | NR                    | NR         | Pediatrics                | NS           | MBI | NR     | NR                                 |
| West et al, 2009 <sup>190</sup>          | USA       | North America           | 239 | NR                    | 148 (62.1) | Internal Medicine         | 2003 to 2009 | MBI | NR     | NR                                 |
| Willcock et al, 2004 <sup>191</sup>      | Australia | Australia & New Zealand | 110 | Mean: 28.3, SD: 3.8   | 62 (56.0)  | Psychiatry                | 2001         | MBI | 54.00% | High EE or DP                      |
| Williford et al, 2018 <sup>192</sup>     | USA       | North America           | 76  | NR                    | NR         | General Surgery           | 2017         | MBI | 75.00% | High EE or DP                      |
| Woodside Jr et al, 2008 <sup>193</sup>   | USA       | North America           | 155 | Mean: 35, SD: 7.5     | 88 (57.0)  | Multiple                  | 2002 to 2005 | MBI | NR     | NR                                 |
| Yroni et al, 2017 <sup>194</sup>         | France    | Europe                  | 271 | Mean: 28.2            | 104 (38.4) | Multiple                  | NS           | MBI | NR     | NR                                 |
| Zis et al, 2014 <sup>195</sup>           | Greece    | Europe                  | 263 | Mean: 33.5, SD: 3.3   | 141 (53.6) | Multiple                  | 2012         | MBI | 14.40% | High EE and 1 of high DP or low PA |
| Zis et al, 2015 <sup>196</sup>           | Greece    | Europe                  | 116 | Mean: 34.5, SD: 3.6   | 52 (44.8)  | Neurology                 | 2014         | MBI | 18.10% | High EE and 1 of high DP or low PA |
| Zubairi and Noordin, 2016 <sup>197</sup> | Pakistan  | Asia                    | 82  | NR                    | 44 (54)    | Multiple                  | 2013         | MBI | NR     | NR                                 |

## References

1. Abdulrahman M, Farooq MM, Al Kharmiri A, Al Marzooqi F, Carrick FR. Burnout and depression among medical residents in the United Arab Emirates: A Multicenter study. *J Fam Med Prim care*. 2018;7(2 PG-435-441):435-441. doi:[https://dx.doi.org/10.4103/jfmpe.jfmpe\\_199\\_17](https://dx.doi.org/10.4103/jfmpe.jfmpe_199_17)
2. Afzal KI, Khan FM, Mulla Z, Akins R, Ledger E, Giordano FL. Primary language and cultural background as factors in resident burnout in medical specialties: a study in a bilingual US city. *South Med J*. 2010;103(7 PG-607-15):607-615. doi:<https://dx.doi.org/10.1097/SMJ.0b013e3181e20cad>
3. Agha A, Mordya A, Anwar E, Saleh N, Rashid I, Saeed M. Burnout among middle-grade doctors of tertiary care hospital in Saudi Arabia. *Work J Prev Assess Rehabil*. 2015;51(4 PG-839-847):839-847. doi:10.3233/wor-141898
4. Akdeniz M, Yaman H, Senol Y, et al. Family practice in Turkey: views of family practice residents. *Postgrad Med*. 2011;123(3 PG-144-9):144-149. doi:<https://dx.doi.org/10.3810/pgm.2011.05.2292>
5. Aksoy DY, Durusu Tanriover M, Dizdar O, et al. Burnout syndrome during residency in internal medicine and pediatrics in a country without working time directive. *Int J Health Care Qual Assur*. 2014;27(3 PG-223-230):223-230. doi:<http://dx.doi.org/10.1108/IJHCQA-12-2012-0127>
6. Al Atassi H, Shapiro MC, Rao S, Dean J, Salama A. Oral and Maxillofacial Surgery Resident Perception of Personal Achievement and Anxiety: A Cross-Sectional Analysis. *J Oral Maxillofac Surg*. 2018;(PG-). doi:<https://dx.doi.org/10.1016/j.joms.2018.06.018>
7. Al-Dubai SAR, Ganasegeran K, Perianayagam W, Rampal KG. Emotional burnout, perceived sources of job stress, professional fulfillment, and

Appendix to: Naji L, Singh B, Shah A, et al. Global prevalence of burnout among postgraduate medical trainees: a systematic review and meta-regression.

*CMAJ Open* 2021. DOI:10.9778/cmajo.20200068. Copyright © 2021 The Author(s) or their employer(s).

To receive this resource in an accessible format, please contact us at [cmajgroup@cmaj.ca](mailto:cmajgroup@cmaj.ca).

- engagement among medical residents in Malaysia. *Sci World J.* 2013;2013(PG-137620):137620. doi:http://dx.doi.org/10.1155/2013/137620
8. Al-Ma'mari NO, Naimi AI, Tulandi T. Prevalence and predictors of burnout among obstetrics and gynecology residents in Canada. *Gynecol Surg.* 2016;13(4 PG-323-327):323-327. doi:http://dx.doi.org/10.1007/s10397-016-0955-3
  9. Aldrees TM, Aleissa S, Zamakhshary M, Badri M, Sadat-Ali M. Physician well-being: Prevalence of burnout and associated risk factors in a tertiary hospital, Riyadh, Saudi Arabia. *Ann Saudi Med.* 2013;33(5 PG-451-456):451-456. doi:http://dx.doi.org/10.5144/0256-4947.2013.451
  10. Aldrees T, Badri M, Islam T, Alqahtani K. Burnout among otolaryngology residents in Saudi Arabia: A multicenter study. *J Surg Educ.* 2015;72(5 PG-844-848):844-848. doi:http://dx.doi.org/10.1016/j.jsurg.2015.02.006
  11. Aldrees T, Hassouneh B, Alabdulkarim A, et al. Burnout among plastic surgery residents: National survey in Saudi Arabia. *Saudi Med J.* 2017;38(8 PG-832-836):832-836. doi:http://dx.doi.org/10.15537/smj.2017.8.18346
  12. Anil M, Yurtseven A, Yurtseven I, et al. The evaluation of burnout and job satisfaction levels in residents of pediatrics. *Turk Pediatr Ars.* 2017;52(2 PG-66-71):66-71. doi:http://dx.doi.org/10.5152/TurkPediatriArs.2017.4982
  13. Antiel RM, Reed DA, Van Arendonk KJ, et al. Effects of Duty Hour Restrictions on Core Competencies, Education, Quality of Life, and Burnout Among General Surgery Interns. *JAMA Surg.* 2013;148(5):448. doi:10.1001/jamasurg.2013.1368
  14. Arora M, Diwan AD, Harris IA. Prevalence and factors of burnout among Australian orthopaedic trainees: a cross-sectional study. *J Orthop Surg (Hong Kong).* 2014;22(3 PG-374-7):374-377. http://ovidsp.ovid.com/ovidweb.cgi?T=JS&PAGE=reference&D=med8&NEWS=N&AN=25550022 NS -.
  15. Ashkar K, Romani M, Musharrafieh U, Chaaya M. Prevalence of burnout syndrome among medical residents: experience of a developing country. *Postgrad Med J.* 2010;86(1015 PG-266-71):266-271. doi:https://dx.doi.org/10.1136/pgmj.2009.092106
  16. Attenello FJ, Buchanan IA, Wen T, et al. Factors associated with burnout among US neurosurgery residents: a nationwide survey. *J Neurosurg.* 2018;(PG-1-15):1-15. doi:https://dx.doi.org/10.3171/2017.9.JNS17996
  17. Baer TE, Feraco AM, Tuysuzoglu Sagalowsky S, Williams D, Litman HJ, Vinci RJ. Pediatric Resident Burnout and Attitudes Toward Patients. *Pediatrics.* 2017;139(3 PG-). doi:https://dx.doi.org/10.1542/peds.2016-2163
  18. Barrack RL, Miller LS, Sotile WM, Sotile MO, Rubash HE. Effect of duty hour standards on burnout among orthopaedic surgery residents. *Clin Orthop Relat Res.* 2006;449:134-137. doi:10.1097/01.blo.0000224030.78108.58
  19. Becker JL, Milad MP, Klock SC. Burnout, depression, and career satisfaction: Cross-sectional study of obstetrics and gynecology residents. *Am J Obstet Gynecol.* 2006;195(5 PG-1444-1449):1444-1449. doi:http://dx.doi.org/10.1016/j.ajog.2006.06.075
  20. Beckman TJ, Reed DA, Shanafelt TD, West CP. Impact of Resident Well-Being and Empathy on Assessments of Faculty Physicians. *J Gen Intern Med.* 2010;25(1):52-56. doi:10.1007/s11606-009-1152-0
  21. Beckman T, Reed D, Shanafelt T, West C. Associations between resident physician well-being and assessments of knowledge and clinical performance. *J Gen Intern Med.* 2011;26(SUPPL. 1 PG-S230):S230. doi:http://dx.doi.org/10.1007/s11606-011-1730-9
  22. Belayachi J, Rkain I, Rkain H, et al. Burnout Syndrome in Moroccan Training Resident: Impact on Quality of Life. *Iran J Public Health.* 2016;45(2 PG-260-2):260-262. http://ovidsp.ovid.com/ovidweb.cgi?T=JS&PAGE=reference&D=pem&NEWS=N&AN=27114993 NS -.
  23. Bellolio MF, Cabrera D, Sadosty AT, et al. Compassion fatigue is similar in emergency medicine residents compared to other medical and surgical specialties. *West J Emerg Med.* 2014;15(6 PG-629-635):629-635. doi:http://dx.doi.org/10.5811/westjem.2014.5.21624
  24. Biaggi P, Peter S, Ulich E. Stressors, emotional exhaustion and aversion to patients in residents and chief residents - what can be done? *Swiss Med Wkly.* 2003;133(23-24):339-346. doi:2003/23/smw-10134
  25. Billings ME, Lazarus ME, Wenrich M, Curtis JR, Engelberg RA. The effect of the hidden curriculum on resident burnout and cynicism. *J Grad Med Educ.* 2011;3(4 PG-503-10):503-510. doi:https://dx.doi.org/10.4300/JGME-D-11-00044.1
  26. Blanchard P, Truchot D, Albiges-Sauvin L, et al. Prevalence and causes of burnout amongst oncology residents: A comprehensive nationwide cross-sectional study. *Eur J Cancer.* 2010;46(15):2708-2715. doi:10.1016/j.ejca.2010.05.014
  27. Block L, Wu AW, Feldman L, Yeh H-C, Desai S V. Residency schedule, burnout and patient care among first-year residents. *Postgrad Med J.* 2013;89(1055 PG-495-500):495-500. doi:https://dx.doi.org/10.1136/postgradmedj-2012-131743
  28. Bogg J, Gibbs T, Bundred P. Training, job demands and mental health of pre-registration house officers. *Med Educ.* 2001;35(6 PG-590-5):590-595. http://ovidsp.ovid.com/ovidweb.cgi?T=JS&PAGE=reference&D=med4&NEWS=N&AN=11380863 NS -.
  29. Bragard I, Etienne A-M, Libert Y, et al. Predictors and correlates of burnout in residents working with cancer patients. *J Cancer Educ.* 2010;25(1 PG-

- 120-6):120-126. doi:<https://dx.doi.org/10.1007/s13187-010-0050-9>
30. Bragard I, Dupuis G, Razavi D, Reynaert C, Etienne AM. Quality of work life in doctors working with cancer patients. *Occup Med (Chic Ill)*. 2012;62(1 PG-34-40):34-40. doi:<http://dx.doi.org/10.1093/occmed/kqr149>
  31. Brant H, Wetherell MA, Lightman S, Crown A, Vedhara K. An exploration into physiological and self-report measures of stress in pre-registration doctors at the beginning and end of a clinical rotation. *Stress*. 2010;13(2 PG-155-62):155-162. doi:<https://dx.doi.org/10.3109/10253890903093778>
  32. Braun SE, Auerbach SM, Rybarczyk B, Lee B, Call S. Mindfulness, burnout, and effects on performance evaluations in internal medicine residents. *Adv Med Educ Pract*. 2017;8(PG-591-597):591-597. doi:<https://dx.doi.org/10.2147/AMEP.S140554>
  33. Campbell J, Prochazka A V, Yamashita T, Gopal R. Predictors of persistent burnout in internal medicine residents: a prospective cohort study. *Acad Med*. 2010;85(10 PG-1630-4):1630-1634. doi:<https://dx.doi.org/10.1097/ACM.0b013e3181f0c4e7>
  34. Castelo-Branco C, Figueras F, Eixarch E, et al. Stress symptoms and burnout in obstetric and gynaecology residents. *BJOG An Int J Obstet Gynaecol*. 2007;114(1 PG-94-98):94-98. doi:<http://dx.doi.org/10.1111/j.1471-0528.2006.01155.x>
  35. Chaput B, Bertheuil N, Jacques J, et al. Professional Burnout Among Plastic Surgery Residents: Can it be Prevented? Outcomes of a National Survey. *Ann Plast Surg*. 2015;75(1 PG-2-8):2-8. doi:<https://dx.doi.org/10.1097/SAP.0000000000000530>
  36. Chati R, Huet E, Grimberg L, Schwarz L, Tuech J-J, Bridoux V. Factors associated With burnout among French digestive surgeons in training: results of a national survey on 328 residents and fellows. *Am J Surg*. 2017;213(4 PG-754-762):754-762. doi:<https://dx.doi.org/10.1016/j.amjsurg.2016.08.003>
  37. Chaukos D, Chad-Friedman E, Mehta DH, et al. Risk and Resilience Factors Associated with Resident Burnout. *Acad Psychiatry*. 2017;41(2 PG-189-194):189-194. doi:<http://dx.doi.org/10.1007/s40596-016-0628-6>
  38. Chen K-Y, Yang C-M, Lien C-H, et al. Burnout, job satisfaction, and medical malpractice among physicians. *Int J Med Sci*. 2013;10(11 PG-1471-8):1471-1478. doi:<https://dx.doi.org/10.7150/ijms.6743>
  39. Choi D, Cedfeldt A, Flores C, Irish K, Brunett P, Girard D. Resident wellness: institutional trends over 10 years since 2003. *Adv Med Educ Pract*. 2017;8(PG-513-523):513-523. doi:<https://dx.doi.org/10.2147/AMEP.S138770>
  40. Cofer KD, Hollis RH, Goss L, Morris MS, Porterfield JR, Chu DI. Burnout is Associated With Emotional Intelligence but not Traditional Job Performance Measurements in Surgical Residents. *J Surg Educ*. 2018;(PG-). doi:<http://dx.doi.org/10.1016/j.jsurg.2018.01.021>
  41. Coluccia A, Fereti F, Bolognesi S, et al. Association between burnout and emotional and sexual life among medical students of postgraduate schools in psychiatry. *Minerva Psichiatr*. 2017;58(4 PG-187-195):187-195. doi:10.23736/s0391-1772.17.01946-x
  42. Cooke GP, Doust JA, Steele MC. A survey of resilience, burnout, and tolerance of uncertainty in Australian general practice registrars. *BMC Med Educ*. 2013;13(PG-2):2. doi:<http://dx.doi.org/10.1186/1472-6920-13-2>
  43. Creed PA, Rogers ME, Praskova A, Searle J. Career calling as a personal resource moderator between environmental demands and burnout in Australian junior doctors. *J Career Dev*. 2014;41(6 PG-547-561):547-561. doi:<http://dx.doi.org/10.1177/0894845313520493>
  44. Cubero DIG, Fumis RRL, de Sa TH, et al. "Burnout in Medical Oncology Fellows: a Prospective Multicenter Cohort Study in Brazilian Institutions." *J Cancer Educ*. 2016;31(3 PG-582-7):582-587. doi:<https://dx.doi.org/10.1007/s13187-015-0850-z>
  45. Dahlin M, Fjell J, Runeson B. Factors at medical school and work related to exhaustion among physicians in their first postgraduate year. *Nord J Psychiatry*. 2010;64(6 PG-402-8):402-408. doi:<https://dx.doi.org/10.3109/08039481003759219>
  46. De Andrade APM, Amaro E, Farhat SCL, Schwartsman C. Higher burnout scores in paediatric residents are associated with increased brain activity during attentional functional magnetic resonance imaging task. *Acta Paediatr Int J Paediatr*. 2016;105(6 PG-705-713):705-713. doi:<http://dx.doi.org/10.1111/apa.13371>
  47. De Oliveira Jr GS, Chang R, Fitzgerald PC, et al. The prevalence of burnout and depression and their association with adherence to safety and practice standards: A survey of united states anesthesiology trainees. *Anesth Analg*. 2013;117(1 PG-182-193):182-193. doi:<http://dx.doi.org/10.1213/ANE.0b013e3182917da9>
  48. Demirci S, Yildirim YK, Ozsaran Z, Uslu R, Yalman D, Aras AB. Evaluation of burnout syndrome in oncology employees. *Med Oncol*. 2010;27(3 PG-968-974):968-974. doi:10.1007/s12032-009-9318-5
  49. Dikmetas E, Top M, Ergin G. An examination of mobbing and burnout of residents. *Turk Psikiyatri Derg*. 2011;22(3 PG-137-49):137-149. <http://ovidsp.ovid.com/ovidweb.cgi?T=JS&PAGE=reference&D=med7&NEWS=N&AN=21870303 NS> -.
  50. Dominguez LC, Stassen L, de Grave W, Sanabria A, Alfonso E, Dolmans D. Taking control: Is job crafting related to the intention to leave surgical

- training? *PLoS One*. 2018;13(6 PG-e0197276):e0197276. doi:<https://dx.doi.org/10.1371/journal.pone.0197276>
51. Doolittle BR, Windish DM, Seelig CB. Burnout, coping, and spirituality among internal medicine resident physicians. *J Grad Med Educ*. 2013;5(2 PG-257-61):257-261. doi:<https://dx.doi.org/10.4300/JGME-D-12-00136.1>
  52. Durning SJ, Costanzo M, Artino AR, et al. Functional neuroimaging correlates of burnout among internal medicine residents and faculty members. *Front Psychiatry*. 2013;4(OCT PG-131):131. doi:<http://dx.doi.org/10.3389/fpsy.2013.00131>
  53. Dyrbye LN, West CP, Satele D, et al. Burnout among u.s. medical students, residents, and early career physicians relative to the general u.s. population. *Acad Med*. 2014;89(3 PG-443-451):443-451. doi:<http://dx.doi.org/10.1097/ACM.0000000000000134>
  54. Elmore LC, Jeffe DB, Jin L, Awad MM, Turnbull IR. National Survey of Burnout among US General Surgery Residents. *J Am Coll Surg*. 2016;223(3 PG-440-451):440-451. doi:<http://dx.doi.org/10.1016/j.jamcollsurg.2016.05.014>
  55. Embriaco N, Azoulay E, Barrau K, et al. High level of burnout in intensivists: Prevalence and associated factors. *Am J Respir Crit Care Med*. 2007;175(7 PG-686-692):686-692. doi:<http://dx.doi.org/10.1164/rccm.200608-1184OC>
  56. Fahrenkopf AM, Sectish TC, Barger LK, et al. Rates of medication errors among depressed and burnt out residents: Prospective cohort study. *BMJ*. 2008;336(7642 PG-488-491):488-491. doi:<http://dx.doi.org/10.1136/bmj.39469.763218.BE>
  57. Ferreira Bortoletti F, Teresa Benevides-Pereira AM, Vasconcellos EG, et al. Triggering risk factors of the burnout syndrome in Ob/Gyn physicians from a reference public university of Brazil. *ISRN Obstet Gynecol*. 2012;(PG-593876):593876. doi:<http://dx.doi.org/10.5402/2012/593876>
  58. Fulop E, Devecsery A, Hausz K, Kovacs Z, Csabai M. Relationship between empathy and burnout among psychiatric residents. *New Med*. 2011;2011-Janua(4 PG-143-147):143-147. <http://www.newmedicine.pl/http://ovidsp.ovid.com/ovidweb.cgi?T=JS&PAGE=reference&D=emed13&NEWS=N&AN=606207483 NS> -.
  59. Galam E, Komly V, Le Tourneur A, Jund J. Burnout among French GPs in training: A cross-sectional study. *Br J Gen Pract*. 2013;63(608 PG-217-224):e217-e224. doi:<http://dx.doi.org/10.3399/bjgp.13X664270>
  60. Garza JA, Schneider KM, Promecene P, Monga M. Burnout in residency: Statewide study. *South Med J*. 2004;97(12 PG-1171-1173):1171-1173. doi:<http://dx.doi.org/10.1097/01.SMJ.0000129926.66568.10>
  61. Geelan-Hansen K, Anne S, Benninger MS. Burnout in Otolaryngology-Head and Neck Surgery: A Single Academic Center Experience. *Otolaryngol - Head Neck Surg (United States)*. 2018;(PG-). doi:<http://dx.doi.org/10.1177/0194599818774740>
  62. Gelfand D V, Podnos YD, Carmichael JC, et al. Effect of the 80-hour workweek on resident Burnout. *Arch Surg*. 2004;139(9 PG-933-940):933-940. doi:<http://dx.doi.org/10.1001/archsurg.139.9.933>
  63. Goitein L, Shanafelt TD, Wipf JE, Slatore CG, Back AL. The effects of work-hour limitations on resident well-being, patient care, and education in an internal medicine residency program. *Arch Intern Med*. 2005;165(22 PG-2601-2606):2601-2606. doi:<http://dx.doi.org/10.1001/archinte.165.22.2601>
  64. Golub JS, Weiss PS, Ramesh AK, Ossoff RH, Johns 3rd MM. Burnout in residents of otolaryngology-head and neck surgery: a national inquiry into the health of residency training. *Acad Med*. 2007;82(6 PG-596-601):596-601. doi:<http://ovidsp.ovid.com/ovidweb.cgi?T=JS&PAGE=reference&D=med5&NEWS=N&AN=17525550 NS> -.
  65. Gopal R, Glasheen JJ, Miyoshi TJ, Prochazka A V. Burnout and internal medicine resident work-hour restrictions. *Arch Intern Med*. 2005;165(22 PG-2595-2600):2595-2600. doi:<http://dx.doi.org/10.1001/archinte.165.22.2595>
  66. Gopal RK, Carreira F, Baker WA, et al. Internal Medicine Residents Reject “Longer and Gentler” Training. *J Gen Intern Med*. 2007;22(1):102-106. doi:10.1007/s11606-007-0119-2
  67. Gouveia PA da C, Ribeiro MHCN, Aschoff CA de M, Gomes DP, Silva NAF da, Cavalcanti HAF. Factors associated with burnout syndrome in medical residents of a university hospital. *Rev Assoc Med Bras*. 2017;63(6 PG-504-511):504-511. doi:<https://dx.doi.org/10.1590/1806-9282.63.06.504>
  68. Govardhan LM, Pinelli V, Schnatz PF. Burnout, depression and job satisfaction in obstetrics and gynecology residents. *Conn Med*. 2012;76(7 PG-389-95):389-395. <http://ovidsp.ovid.com/ovidweb.cgi?T=JS&PAGE=reference&D=med7&NEWS=N&AN=23248861 NS> -.
  69. Goveia CS, Cruz TTMD, de Miranda DB, et al. Association between burnout syndrome and anxiety in residents and anesthesiologists of the Federal District. *Brazilian J Anesthesiol*. 2018;(PG-). doi:<http://dx.doi.org/10.1016/j.bjan.2018.02.007>
  70. Guenette JP, Smith SE. Burnout: Prevalence and associated factors among radiology residents in New England with comparison against United States resident physicians in other specialties. *Am J Roentgenol*. 2017;209(1 PG-136-141):136-141. doi:<http://dx.doi.org/10.2214/AJR.16.17541>
  71. Guenette JP, Smith SE. Burnout: Job Resources and Job Demands Associated With Low Personal Accomplishment in United States Radiology

- Residents. *Acad Radiol.* 2018;25(6 PG-739-743):739-743. doi:http://dx.doi.org/10.1016/j.acra.2017.12.002
72. Gulen B, Serinken M, Eken C, et al. Serum S100B as a Surrogate Biomarker in the Diagnoses of Burnout and Depression in Emergency Medicine Residents. *Acad Emerg Med.* 2016;23(7 PG-786-789):786-789. doi:http://dx.doi.org/10.1111/acem.12973
73. Guthrie E, Tattan T, Williams E, Black D, Bacliocotti H. Sources of stress, psychological distress and burnout in psychiatrists. *Psychiatr Bull.* 1999;23(4 PG-207-212):207-212. http://ovidsp.ovid.com/ovidweb.cgi?T=JS&PAGE=reference&D=emed6&NEWS=N&AN=29160925 NS -.
74. Halliday L, Walker A, Vig S, Hines J, Brecknell J. Grit and burnout in UK doctors: a cross-sectional study across specialties and stages of training. *Postgrad Med J.* 2017;93(1101 PG-389-394):389-394. doi:10.1136/postgradmedj-2015-133919
75. Hameed TK, Masuadi E, Al Asmary NA, Al-Anzi FG, Al Dubayee MS. A study of resident duty hours and burnout in a sample of Saudi residents. *BMC Med Educ.* 2018;18(1 PG-180):180. doi:https://dx.doi.org/10.1186/s12909-018-1300-5
76. Hannan E, Breslin N, Doherty E, McGreal M, Moneley D, Offiah G. Burnout and stress amongst interns in Irish hospitals: contributing factors and potential solutions. *Ir J Med Sci.* 2018;187(2 PG-301-307):301-307. doi:http://dx.doi.org/10.1007/s11845-017-1688-7
77. Hausler M, Strecker C, Huber A, Brenner M, Hoge T, Hofer S. Associations between the Application of Signature Character Strengths, Health and Well-being of Health Professionals. *Front Psychol.* 2017;8(PG-1307):1307. doi:https://dx.doi.org/10.3389/fpsyg.2017.01307
78. Henning MA, Sollers J, Strom JM, et al. Junior doctors in their first year: mental health, quality of life, burnout and heart rate variability. *Perspect Med Educ.* 2014;3(2 PG-136-43):136-143. doi:https://dx.doi.org/10.1007/s40037-013-0075-y
79. Hill JD, Smith RJH. Monitoring stress levels in postgraduate medical training. *Laryngoscope.* 2009;119(1 PG-75-8):75-78. doi:https://dx.doi.org/10.1002/lary.20013
80. Hillhouse JJ, Adler CM, Walters DN. A simple model of stress, burnout and symptomatology in medical residents: A longitudinal study. *Psychol Heal Med.* 2000;5(1 PG-63-73):63-73. doi:http://dx.doi.org/10.1080/135485000106016
81. Holmes EG, Connolly A, Putnam KT, et al. Taking Care of Our Own: A Multispecialty Study of Resident and Program Director Perspectives on Contributors to Burnout and Potential Interventions. *Acad Psychiatry.* 2017;41(2 PG-159-166):159-166. doi:http://dx.doi.org/10.1007/s40596-016-0590-3
82. Huggard P, Dixon R. "Tired of caring": The impact of caring on resident doctors. *Australas J Disaster Trauma Stud.* 2011;2011(3 PG-105-111):105-111. http://ovidsp.ovid.com/ovidweb.cgi?T=JS&PAGE=reference&D=psyc8&NEWS=N&AN=2012-03764-004 NS -.
83. Hutter MM, Kellogg KC, Ferguson CM, Abbott WM, Warshaw AL. The impact of the 80-hour resident workweek on surgical residents and attending surgeons. *Ann Surg.* 2006;243(6 PG-864-871):864-871. doi:http://dx.doi.org/10.1097/01.sla.0000220042.48310.66
84. S Hwang J, A Ippolito J, S Beebe K, Benevenia J, S Berberian W. Dealing with the loss of a resident: An analysis of burnout rates in a reduced complement training program. *Work.* 2018;(PG-). doi:https://dx.doi.org/10.3233/WOR-182764
85. Hyman SA, Michaels DR, Berry JM, Schildcrout JS, Mercaldo ND, Weinger MB. Risk of burnout in perioperative clinicians: a survey study and literature review. *Anesthesiology.* 2011;114(1 PG-194-204):194-204. doi:https://dx.doi.org/10.1097/ALN.0b013e318201ce9a
86. Jamjoom RS, Park YS. Assessment of pediatric residents burnout in a tertiary academic centre. *Saudi Med J.* 2018;39(3 PG-296-300):296-300. doi:http://dx.doi.org/10.15537/smj.2018.3.22328
87. Jin WM, Zhang Y, Wang XP. Job burnout and organizational justice among medical interns in Shanghai, People's Republic of China. *Adv Med Educ Pract.* 2015;6(PG-539-544):539-544. doi:10.2147/amep.s88953
88. Joaquim A, Custodio S, Savva-Bordalo J, et al. Burnout and occupational stress in the medical residents of Oncology, Haematology and Radiotherapy: a prevalence and predictors study in Portugal. *Psychol Health Med.* 2018;23(3 PG-317-324):317-324. doi:https://dx.doi.org/10.1080/13548506.2017.1344256
89. Jovanovic N, Podlesek A, Volpe U, et al. Burnout syndrome among psychiatric trainees in 22 countries: Risk increased by long working hours, lack of supervision, and psychiatry not being first career choice. *Eur Psychiatry.* 2016;32(PG-34-41):34-41. doi:10.1016/j.eurpsy.2015.10.007
90. Kang E-K, Lihm H-S, Kong E-H. Association of intern and resident burnout with self-reported medical errors. *Korean J Fam Med.* 2013;34(1 PG-36-42):36-42. doi:https://dx.doi.org/10.4082/kjfm.2013.34.1.36
91. Karaoglu N, Pekcan S, Durduran Y, Mergen H, Odabasi D, Ors R. A sample of paediatric residents' loneliness-anxiety-depression-burnout and job satisfaction with probable affecting factors. *J Pak Med Assoc.* 2015;65(2 PG-183-191):183-191. http://jpma.org.pk/PdfDownload/7168.pdf  
http://ovidsp.ovid.com/ovidweb.cgi?T=JS&PAGE=reference&D=emed17&NEWS=N&AN=603983631 NS -.

92. Kash KM, Holland JC, Breitbart W, et al. Stress and burnout in oncology. *Oncol York*. 2000;14(11 PG-1621-+):1621-+.
93. Kassam A, Horton J, Shoimer I, Patten S. Predictors of Well-Being in Resident Physicians: A Descriptive and Psychometric Study. *J Grad Med Educ*. 2015;7(1 PG-70-74):70-74. doi:http://dx.doi.org/10.4300/JGME-D-14-00022.1
94. Kealy D, Halli P, Ogrodniczuk JS, Hadjipavlou G. Burnout among Canadian Psychiatry Residents: A National Survey. *Can J Psychiatry*. 2016;61(11 PG-732-736):732-736. doi:http://dx.doi.org/10.1177/0706743716645286
95. Kolarik RC, O'Neal RL, Ewing JA. Resident Preferences for Program Director Role in Wellness Management. *J Gen Intern Med*. 2018;(PG-1-5):1-5. doi:http://dx.doi.org/10.1007/s11606-018-4367-0
96. Komur I, Ozdemirel RO, Ozver I, et al. Posttraumatic Stress and Burnout Symptoms in Forensic Doctors and Staff in a Mortuary. *Am J Forensic Med Pathol*. 2017;38(3 PG-184-188):184-188. doi:http://dx.doi.org/10.1097/PAF.0000000000000329
97. Krug MF, Golob AL, Wander PL, Wipf JE. Changes in Resident Well-Being at One Institution Across a Decade of Progressive Work Hours Limitations. *Acad Med*. 2017;92(10 PG-1480-1484):1480-1484. doi:http://dx.doi.org/10.1097/ACM.0000000000001675
98. Kwah J, Weintraub J, Fallar R, Ripp J. The Effect of Burnout on Medical Errors and Professionalism in First-Year Internal Medicine Residents. *J Grad Med Educ*. 2016;8(4 PG-597-600):597-600. http://ovidsp.ovid.com/ovidweb.cgi?T=JS&PAGE=reference&D=emexa&NEWS=N&AN=615609921 NS -
99. Lambden JP, Chamberlin P, Kozlov E, et al. Association of Perceived Futile or Potentially Inappropriate Care With Burnout and Thoughts of Quitting Among Health-Care Providers. *Am J Hosp Palliat Care*. 2018;(PG-1049909118792517):1049909118792517. doi:https://dx.doi.org/10.1177/1049909118792517
100. Landrigan CP, Fahrenkopf AM, Lewin D, et al. Effects of the Accreditation Council for Graduate Medical Education Duty Hour Limits on Sleep, Work Hours, and Safety. *Pediatrics*. 2008;122(2):250-258. doi:10.1542/peds.2007-2306
101. Leach PK, Nygaard RM, Chipman JG, Brunsvold ME, Marek AP. Impostor Phenomenon and Burnout in General Surgeons and General Surgery Residents. *J Surg Educ*. 2018;(PG-). doi:https://dx.doi.org/10.1016/j.jsurg.2018.06.025
102. Lebares CC, Guvva E V, Ascher NL, O'Sullivan PS, Harris HW, Epel ES. Burnout and Stress Among US Surgery Residents: Psychological Distress and Resilience. *J Am Coll Surg*. 2018;226(1 PG-80-90):80-90. doi:http://dx.doi.org/10.1016/j.jamcollsurg.2017.10.010
103. Lebensohn P, Dodds S, Benn R, et al. Resident wellness behaviors: relationship to stress, depression, and burnout. *Fam Med*. 2013;45(8 PG-541-549):541-549. http://ovidsp.ovid.com/ovidweb.cgi?T=JS&PAGE=reference&D=emed15&NEWS=N&AN=563066226 NS -
104. Lee PT, Loh J, Sng G, Tung J, Yeo KK. Empathy and burnout: A study on residents from a Singapore institution. *Singapore Med J*. 2018;59(1 PG-50-54):50-54. doi:http://dx.doi.org/10.11622/smedj.2017096
105. Lemkau JP. Sex Role Stress and Job Burnout among Family Practice Physicians. *J Vocat Behav*. 1987;31(1 PG-81-90):81-90. http://libaccess.mcmaster.ca/login?url=https://search.proquest.com/docview/63148790?accountid=12347 http://sfx.scholarsportal.info/mcmaster?url\_ver=Z39.88-2004&rft\_val\_fmt=info:ofi/fmt:kev:mtx:journal&genre=article&sid=ProQ:ProQ%3Aeric&atitle=Sex+Role+Str.
106. Leung J, Rioseco P. Burnout, stress and satisfaction among Australian and New Zealand radiation oncology trainees. *J Med Imaging Radiat Oncol*. 2017;61(1 PG-146-155):146-155. doi:10.1111/1754-9485.12541
107. Levin KH, Shanafelt TD, Keran CM, et al. Burnout, career satisfaction, and well-being among US neurology residents and fellows in 2016. *Neurology*. 2017;89(5 PG-492-501):492-501. doi:http://dx.doi.org/10.1212/WNL.0000000000004135
108. Lin DT, Liebert CA, Tran J, Lau JN, Salles A. Emotional Intelligence as a Predictor of Resident Well-Being. *J Am Coll Surg*. 2016;223(2 PG-352-358):352-358. doi:http://dx.doi.org/10.1016/j.jamcollsurg.2016.04.044
109. Lindeman BM, Sacks BC, Hirose K, Lipsett PA. Multifaceted longitudinal study of surgical resident education, quality of life, and patient care before and after July 2011. *J Surg Educ*. 2013;70(6 PG-769-776):769-776. doi:http://dx.doi.org/10.1016/j.jsurg.2013.06.018
110. Lindeman B, Petrusa E, McKinley S, et al. Association of Burnout With Emotional Intelligence and Personality in Surgical Residents: Can We Predict Who Is Most at Risk? *J Surg Educ*. 2017;74(6 PG-22-30):e22-e30. doi:http://dx.doi.org/10.1016/j.jsurg.2017.11.001
111. Llera J, Durante E. Correlation between the educational environment and burn-out syndrome in residency programs at a university hospital. *Arch Argent Pediatr*. 2014;112(1 PG-6-11):6-11. doi:http://dx.doi.org/10.1590/S0325-00752014000100003
112. Low JM, Tan MY, See KC, Aw MM. Sleep, activity and fatigue reported by postgraduate year 1 residents: a prospective cohort study comparing the



- effects of night-float versus traditional overnight on-call. *Singapore Med J.* 2018;(PG-). doi:<https://dx.doi.org/10.11622/smedj.2018036>
113. Lue B-H, Chen H-J, Wang C-W, Cheng Y, Chen M-C. Stress, personal characteristics and burnout among first postgraduate year residents: a nationwide study in Taiwan. *Med Teach.* 2010;32(5 PG-400-7):400-407. doi:<https://dx.doi.org/10.3109/01421590903437188>
  114. Malik AA, Bhatti S, Shafiq A, et al. Burnout among surgical residents in a lower-middle income country - Are we any different? *Ann Med Surg.* 2016;9(PG-28-32):28-32. doi:<http://dx.doi.org/10.1016/j.amsu.2016.05.012>
  115. Markwell AL, Wainer Z. The health and wellbeing of junior doctors: insights from a national survey. *Med J Aust.* 2009;191(8 PG-441-4):441-444. <http://ovidsp.ovid.com/ovidweb.cgi?T=JS&PAGE=reference&D=med6&NEWS=N&AN=19835538> NS -.
  116. Martini S, Arfken CL, Churchill A, Balon R. Burnout comparison among residents in different medical specialties. *Acad Psychiatry.* 2004;28(3 PG-240-242):240-242. doi:<http://dx.doi.org/10.1176/appi.ap.28.3.240>
  117. Martini S, Arfken CL, Balon R. Comparison of Burnout Among Medical Residents Before and After the Implementation of Work Hours Limits. *Acad Psychiatry.* 2006;30(4):352-355. doi:10.1176/appi.ap.30.4.352
  118. McNeeley MF, Perez FA, Chew FS. The emotional wellness of radiology trainees: Prevalence and predictors of burnout. *Acad Radiol.* 2013;20(5 PG-647-655):647-655. doi:<http://dx.doi.org/10.1016/j.acra.2012.12.018>
  119. Michels PJ, Probst JC, Godenick MT, Palesch Y. Anxiety and anger among family practice residents: A South Carolina family practice research consortium study. *Acad Med.* 2003;78(1 PG-69-79):69-79. <http://www.lww.com/product/?1040-2446> <http://ovidsp.ovid.com/ovidweb.cgi?T=JS&PAGE=reference&D=emexa&NEWS=N&AN=36105728> NS -.
  120. Miyoshi R, Matsuo H, Takeda R, Komatsu H, Abe H, Ishida Y. Burnout in Japanese residents and its associations with temperament and character. *Asian J Psychiatr.* 2016;24(PG-5-9):5-9. doi:<http://dx.doi.org/10.1016/j.ajp.2016.08.009>
  121. Mohammed KA-M, Ali EG, Youssef IM, Fahmy MT, Haggag WE. Depression and burnout among residents. *Arab J Psychiatry.* 2014;25(1 PG-40-51):40-51. doi:<http://dx.doi.org/10.12816/0004114>
  122. Moloney J, MacDonald J. Psychiatric training in New Zealand. *Aust N Z J Psychiatry.* 2000;34(1 PG-146-53):146-153. <http://ovidsp.ovid.com/ovidweb.cgi?T=JS&PAGE=reference&D=med4&NEWS=N&AN=11185928> NS -.
  123. Mordant P, Deneuve S, Rivera C, et al. Quality of Life of Surgical Oncology Residents and Fellows Across Europe. *J Surg Educ.* 2014;71(2 PG-222-228):222-228. doi:10.1016/j.jsurg.2013.07.010
  124. Msaouel P, Keramaris NC, Tasoulis A, et al. Burnout and training satisfaction of medical residents in Greece: will the European Work Time Directive make a difference? *Hum Resour Health.* 2010;8(PG-16):16. doi:<https://dx.doi.org/10.1186/1478-4491-8-16>
  125. Myszkowski N, Villoing B, Zenasni F, Jaury P, Boujut E. Monitoring stress among internal medicine residents: an experience-driven, practical and short measure. *Psychol Health Med.* 2017;22(6 PG-719-726):719-726. doi:<http://dx.doi.org/10.1080/13548506.2016.1220599>
  126. Nolan KJ, Writer H, Ladhani M. Wellness in Canadian paediatric residents and their program directors. *Paediatr Child Heal.* 2017;22(4 PG-199-202):199-202. doi:<http://dx.doi.org/10.1093/pch/pxx050>
  127. O'Connor P, Lydon S, O'Dea A, et al. A longitudinal and multicentre study of burnout and error in Irish junior doctors. *Postgrad Med J.* 2017;93(1105 PG-660-664):660-664. doi:<http://dx.doi.org/10.1136/postgradmedj-2016-134626>
  128. Ogundipe OA, Olagunju AT, Lasebikan VO, Coker AO. Burnout among doctors in residency training in a tertiary hospital. *Asian J Psychiatr.* 2014;10(PG-27-32):27-32. doi:<http://dx.doi.org/10.1016/j.ajp.2014.02.010>
  129. Okpozo AZ, Gong T, Ennis MC, Adenuga B. Investigating the impact of ethical leadership on aspects of burnout. *Leadersh Organ Dev J.* 2017;38(8 PG-1128-1143):1128-1143. doi:<http://dx.doi.org/10.1108/LODJ-09-2016-0224>
  130. Olson SM, Odo NU, Duran AM, Pereira AG, Mandel JH. Burnout and Physical Activity in Minnesota Internal Medicine Resident Physicians. *J Grad Med Educ.* 2014;6(4):669-674. doi:10.4300/JGME-D-13-00396
  131. Olson K, Kemper KJ, Mahan JD. What Factors Promote Resilience and Protect Against Burnout in First-Year Pediatric and Medicine-Pediatric Residents? *J Evid Based Complementary Altern Med.* 2015;20(3):192-198. doi:10.1177/2156587214568894
  132. Panagopoulou E, Montgomery A, Benos A. Burnout in internal medicine physicians: Differences between residents and specialists. *Eur J Intern Med.* 2006;17(3 PG-195-200):195-200. doi:<http://dx.doi.org/10.1016/j.ejim.2005.11.013>
  133. Pantaleoni JL, Augustine EM, Sourkes BM, Bachrach LK. Burnout in pediatric residents over a 2-year period: A longitudinal study. *Acad Pediatr.* 2014;14(2 PG-167-172):167-172. doi:<http://dx.doi.org/10.1016/j.acap.2013.12.001>

134. Park C, Lee YJ, Hong M, et al. A Multicenter Study Investigating Empathy and Burnout Characteristics in Medical Residents with Various Specialties. *J Korean Med Sci.* 2016;31(4 PG-590-597):590-597. doi:<http://dx.doi.org/10.3346/jkms.2016.31.4.590>
135. Parr JM, Pinto N, Hanson M, Meehan A, Moore PT. Medical graduates, tertiary hospitals, and burnout: A longitudinal cohort study. *Ochsner J.* 2016;16(1 PG-22-26):22-26. <http://www.ochsnerjournal.org/doi/pdf/10.1043/TOJ-14-0055>  
<http://ovidsp.ovid.com/ovidweb.cgi?T=JS&PAGE=reference&D=emed18&NEWS=N&AN=609110258> NS -.
136. Pereira-Lima K, Loureiro SR. Burnout, anxiety, depression, and social skills in medical residents. *Psychol Health Med.* 2015;20(3 PG-353-362):353-362. doi:<http://dx.doi.org/10.1080/13548506.2014.936889>
137. Porrino J, Mulcahy MJ, Mulcahy H, Relyea-Chew A, Chew FS. Emotional Wellness of Current Musculoskeletal Radiology Fellows. *Acad Radiol.* 2017;24(6 PG-682-693):682-693. doi:<http://dx.doi.org/10.1016/j.acra.2016.12.024>
138. Prins JT, Hoekstra-Weebers J, van de Wiel HBM, Gazendam-Donofrio SM, Sprangers F, Jaspers FCA. Burnout among Dutch medical residents. *Int J Behav Med.* 2007;14(3 PG-119-125):119-125. doi:10.1007/bf03000182
139. Prins JT, Hoekstra-Weebers JEHM, Gazendam-Donofrio SM, et al. Burnout and engagement among resident doctors in the Netherlands: a national study. *Med Educ.* 2010;44(3 PG-236-47):236-247. doi:<https://dx.doi.org/10.1111/j.1365-2923.2009.03590.x>
140. Purdy RR, Lemkau JP, Rafferty JP, Rudisill JR. Resident physicians in family practice: who's burned out and who knows? *Fam Med.* 1987;19(3):203-208. <http://www.ncbi.nlm.nih.gov/pubmed/3596113>. Accessed June 29, 2019.
141. Racic M, Virijevic A, Ivkovic N, Joksimovic BN, Joksimovic VR, Mijovic B. Compassion fatigue and compassion satisfaction among family physicians in the Republic of Srpska, Bosnia and Herzegovina. *Int J Occup Saf Ergon.* 2018;(PG-1-8):1-8. doi:<https://dx.doi.org/10.1080/10803548.2018.1440044>
142. Ramey SJ, Ahmed AA, Takita C, Wilson LD, Thomas CR, Yechieli R. Burnout Evaluation of Radiation Residents Nationwide: Results of a Survey of United States Residents. *Int J Radiat Oncol Biol Phys.* 2017;99(3 PG-530-538):530-538. doi:<http://dx.doi.org/10.1016/j.ijrobp.2017.06.014>
143. Ratnakaran B, Prabhakaran A, Karunakaran V. Prevalence of burnout and its correlates among residents in a tertiary medical center in Kerala, India: A cross-sectional study. *J Postgrad Med.* 2016;62(3 PG-157-161):157-161. doi:<http://dx.doi.org/10.4103/0022-3859.184274>
144. Raviola G, Machoki M, Mwaikambo E, Good MJD. HIV, disease plague, demoralization and "burnout": resident experience of the medical profession in Nairobi, Kenya. *Cult Med Psychiatry.* 2002;26(1):55-86. <http://www.ncbi.nlm.nih.gov/pubmed/12088098>. Accessed June 29, 2019.
145. Ringrose R, Houterman S, Koops W, Oei G. Burnout in medical residents: A questionnaire and interview study. *Psychol Heal Med.* 2009;14(4 PG-476-486):476-486. doi:<http://dx.doi.org/10.1080/13548500903012822>
146. Ripp J, Fallar R, Babyatsky M, David R, Reich L, Korenstein D. Prevalence of resident burnout at the start of training. *Teach Learn Med.* 2010;22(3 PG-172-5):172-175. doi:<https://dx.doi.org/10.1080/10401334.2010.488194>
147. Ripp J, Babyatsky M, Fallar R, et al. The incidence and predictors of job burnout in first-year internal medicine residents: a five-institution study. *Acad Med.* 2011;86(10 PG-1304-10):1304-1310. doi:<https://dx.doi.org/10.1097/ACM.0b013e31822c1236>
148. Ripp JA, Bellini L, Fallar R, Bazari H, Katz JT, Korenstein D. The impact of duty hours restrictions on job burnout in internal medicine residents: a three-institution comparison study. *Acad Med.* 2015;90(4 PG-494-499):494-499. doi:<http://dx.doi.org/10.1097/ACM.0000000000000641>
149. Robertson SL, Robinson MD, Reid A. Electronic Health Record Effects on Work-Life Balance and Burnout Within the I3 Population Collaborative. *J Grad Med Educ.* 2017;9(4 PG-479-484):479-484. doi:<http://dx.doi.org/10.4300/JGME-D-16-00123.1>
150. Rogers ME, Creed PA, Searle J. Emotional labour, training stress, burnout, and depressive symptoms in junior doctors. *J Vocat Educ Train.* 2014;66(2 PG-232-248):232-248. NS -.
151. Rogers E, Polonijo AN, Carpiano RM. Getting by with a little help from friends and colleagues: Testing how residents' social support networks affect loneliness and burnout. *Can Fam Physician.* 2016;62(11 PG-677-683):e677-e683. <http://www.cfp.ca/content/62/11/e677.full.pdf+html>  
<http://ovidsp.ovid.com/ovidweb.cgi?T=JS&PAGE=reference&D=emed18&NEWS=N&AN=613299251> NS -.
152. Rosen IM, Gimotty PA, Shea JA, Bellini LM. Evolution of sleep quantity, sleep deprivation, mood disturbances, empathy, and burnout among interns. *Acad Med.* 2006;81(1 PG-82-85):82-85. doi:<http://dx.doi.org/10.1097/00001888-200601000-00020>
153. Rui M, Ting C, Pengqian F, Xinqiao F. Burnout among anaesthetists in Chinese hospitals: a multicentre, cross-sectional survey in 6 provinces. *J Eval Clin Pract.* 2016;22(3):387-394. doi:10.1111/jep.12498
154. Ruitenburg MM, Frings-Dresen MH, Sluiter JK. The prevalence of common mental disorders among hospital physicians and their association with self-reported work ability: a cross-sectional study. *BMC Health Serv Res.* 2012;12(1):292. doi:10.1186/1472-6963-12-292

155. Sajjadi S, Norena M, Wong H, Dodek P. Moral distress and burnout in internal medicine residents. *Can Med Educ J*. 2017;8(1 PG-36-43):e36-e43. <http://ovidsp.ovid.com/ovidweb.cgi?T=JS&PAGE=reference&D=prem&NEWS=N&AN=28344714> NS -.
156. Salles A, Cohen GL, Mueller CM. The relationship between grit and resident well-being. *Am J Surg*. 2014;207(2 PG-251-254):251-254. doi:<http://dx.doi.org/10.1016/j.amjsurg.2013.09.006>
157. Salpigktidis II, Paliouras D, Gogakos AS, et al. Burnout syndrome and job satisfaction in Greek residents: exploring differences between trainees inside and outside the country. *Ann Transl Med*. 2016;4(22 PG-444):444. doi:<https://dx.doi.org/10.21037/atm.2016.11.33>
158. Sargent MC, Sotile W, Sotile MO, Rubash H, Barrack RL. Stress and coping among orthopaedic surgery residents and faculty. *J Bone Jt Surg - Ser A*. 2004;86(7 PG-1579-1586):1579-1586. <http://ovidsp.ovid.com/ovidweb.cgi?T=JS&PAGE=reference&D=emed9&NEWS=N&AN=38886551> NS -.
159. Sargent MC, Sotile W, Sotile MO, Rubash H, Barrack RL. Quality of life during orthopaedic training and academic practice. Part 1: Orthopaedic surgery residents and faculty. *J Bone Jt Surg - Ser A*. 2009;91(10 PG-2395-2405):2395-2405. doi:<http://dx.doi.org/10.2106/JBJS.H.00665>
160. Satterfield J, Swenson S, Rabow M. Emotional Intelligence in Internal Medicine Residents: Educational Implications for Clinical Performance and Burnout. *Ann Behav Sci Med Educ*. 2009;14(2 PG-65-68):65-68. <http://ovidsp.ovid.com/ovidweb.cgi?T=JS&PAGE=reference&D=medp&NEWS=N&AN=20407619> NS -.
161. Schweitzer B. Stress and burnout in junior doctors. *S Afr Med J*. 1994;84(6 PG-352-4):352-354. <http://ovidsp.ovid.com/ovidweb.cgi?T=JS&PAGE=reference&D=med3&NEWS=N&AN=7740383> NS -.
162. See KC, Lim TK, Kua EH, Phua J, Chua GS, Ho KY. Stress and Burnout among Physicians: Prevalence and Risk Factors in a Singaporean Internal Medicine Programme. *Ann Acad Med Singapore*. 2016;45(10 PG-471-474):471-474. <http://ovidsp.ovid.com/ovidweb.cgi?T=JS&PAGE=reference&D=med8&NEWS=N&AN=27832222> NS -.
163. Selic P, Stegne-Ignjatovic T, Klemenc-Ketis Z. Burnout among Slovenian family medicine trainees: A cross-sectional study. *Zdr Vestn*. 2012;81(3 PG-218-224):218-224. <http://vestnik.sz.d.si/index.php/vestnik/article/download/764/680> <http://ovidsp.ovid.com/ovidweb.cgi?T=JS&PAGE=reference&D=emed14&NEWS=N&AN=364528464> NS -.
164. Shakir HJ, McPheeters MJ, Shallwani H, Pittari JE, Reynolds RM. The Prevalence of Burnout Among US Neurosurgery Residents. *Neurosurgery*. 2017;(PG-). doi:<https://dx.doi.org/10.1093/neuros/nyx494>
165. Shams T, El-Masry R. Job Stress and Burnout among Academic Career Anaesthesiologists at an Egyptian University Hospital. *Sultan Qaboos Univ Med J*. 2013;13(2):287-295. <http://www.ncbi.nlm.nih.gov/pubmed/23862036>. Accessed June 29, 2019.
166. Shanafelt TD, Bradley KA, Wipf JE, Back AL. Burnout and self-reported patient care in an internal medicine residency program. *Ann Intern Med*. 2002;136(5 PG-358-367):358-367. <http://ovidsp.ovid.com/ovidweb.cgi?T=JS&PAGE=reference&D=emed8&NEWS=N&AN=34183994> NS -.
167. Shanafelt TD, Raymond M, Horn L, et al. Oncology Fellows' Career Plans, Expectations, and Well-Being: Do Fellows Know What They Are Getting Into? *J Clin Oncol*. 2014;32(27 PG-2991-+):2991-+. doi:10.1200/jco.2014.56.2827
168. Shapiro MC, Rao SR, Dean J, Salama AR. What a Shame: Increased Rates of OMS Resident Burnout May Be Related to the Frequency of Shamed Events During Training. *J Oral Maxillofac Surg*. 2017;75(3 PG-449-457):449-457. doi:<http://dx.doi.org/10.1016/j.joms.2016.08.040>
169. Shoimer I, Patten S, Mydlarski PR. Burnout in dermatology residents: a Canadian perspective. *Br J Dermatol*. 2018;178(1 PG-270-271):270-271. doi:<http://dx.doi.org/10.1111/bjd.15549>
170. Simpkin AL, Khan A, West DC, et al. Stress From Uncertainty and Resilience Among Depressed and Burned Out Residents: A Cross-Sectional Study. *Acad Pediatr*. 2018;(PG-). doi:<http://dx.doi.org/10.1016/j.acap.2018.03.002>
171. Siu CFY, Yuen SK, Cheung A. Burnout among public doctors in Hong Kong: cross-sectional survey. *Hong Kong Med J*. 2012;18(3 PG-186-192):186-192.
172. Sochos A, Bowers A. Burnout, occupational stressors, and social support in psychiatric and medical trainees. *Eur J Psychiatry*. 2012;26(3 PG-196-206):196-206. doi:10.4321/s0213-61632012000300006
173. Spataro BM, Tilstra SA, Rubio DM, McNeil MA. The Toxicity of Self-Blame: Sex Differences in Burnout and Coping in Internal Medicine Trainees. *J Women's Heal*. 2016;25(11 PG-1147-1152):1147-1152. doi:<http://dx.doi.org/10.1089/jwh.2015.5604>
174. Stodel JM, Stewart-Smith A. The influence of burnout on skills retention of junior doctors at Red Cross War Memorial Children's Hospital: a case study. *S Afr Med J*. 2011;101(2 PG-115-8):115-118. <http://ovidsp.ovid.com/ovidweb.cgi?T=JS&PAGE=reference&D=med7&NEWS=N&AN=21678738> NS -.
175. Sulaiman CFC, Henn P, Smith S, O'Tuathaigh CMP. Burnout syndrome among non-consultant hospital doctors in Ireland: relationship with self-reported

- patient care. *Int J Qual Heal care J Int Soc Qual Heal Care*. 2017;29(5 PG-679-684):679-684. doi:<https://dx.doi.org/10.1093/intqhc/mzx087>
176. Swami MK, Mathur DM, Pushp BK. Emotional intelligence, perceived stress and burnout among resident doctors: An assessment of the relationship. *Natl Med J India*. 2013;26(4 PG-210-213):210-213. <http://www.nmji.in/archives/Volume-26/Issue-4/OA-III.pdf>  
<http://ovidsp.ovid.com/ovidweb.cgi?T=JS&PAGE=reference&D=emed15&NEWS=N&AN=372957372> NS -.
  177. Talih F, Warakian R, Ajaltouni J, Shehab AA, Tamim H. Correlates of Depression and Burnout Among Residents in a Lebanese Academic Medical Center: a Cross-Sectional Study. *Acad Psychiatry*. 2016;40(1 PG-38-45):38-45. doi:<http://dx.doi.org/10.1007/s40596-015-0400-3>
  178. Toral-Villanueva R, Aguilar-Madrid G, Juarez-Perez CA. Burnout and patient care in junior doctors in Mexico City. *Occup Med (Lond)*. 2009;59(1 PG-8-13):8-13. doi:<https://dx.doi.org/10.1093/occmed/kqn122>
  179. Torppa MA, Kuikka L, Nevalainen M, Pitkala KH. Emotionally exhausting factors in general practitioners' work. *Scand J Prim Health Care*. 2015;33(3 PG-178-183):178-183. doi:10.3109/02813432.2015.1067514
  180. Trockel M, Bohman B, Lesure E, et al. A Brief Instrument to Assess Both Burnout and Professional Fulfillment in Physicians: Reliability and Validity, Including Correlation with Self-Reported Medical Errors, in a Sample of Resident and Practicing Physicians. *Acad Psychiatry*. 2018;42(1 PG-11-24):11-24. doi:<https://dx.doi.org/10.1007/s40596-017-0849-3>
  181. Turgut N, Karacalar S, Polat C, et al. Burnout Syndrome During Residency. *Turkish J Anaesthesiol Reanim*. 2016;44(5 PG-258-264):258-264. <http://ovidsp.ovid.com/ovidweb.cgi?T=JS&PAGE=reference&D=prem&NEWS=N&AN=27909607> NS -.
  182. Tzischinsky O, Zohar D, Epstein R, Chillag N, Lavie P. Daily and yearly burnout symptoms in Israeli shift work residents. *J Hum Ergol (Tokyo)*. 2001;30(1-2):357-362. <http://www.ncbi.nlm.nih.gov/pubmed/14564908>. Accessed June 29, 2019.
  183. van der Wal RAB, Buxx MJL, Hendriks JCM, Scheffer GJ, Prins JB. Psychological distress, burnout and personality traits in Dutch anaesthesiologists A survey. *Eur J Anaesthesiol*. 2016;33(3 PG-179-186):179-186. doi:10.1097/eja.0000000000000375
  184. van Vendeloo SN, Brand PLP, Verheyen CCPM. Burnout and quality of life among orthopaedic trainees in a modern educational programme: importance of the learning climate. *Bone Joint J*. 2014;96-B(8 PG-1133-8):1133-1138. doi:<https://dx.doi.org/10.1302/0301-620X.96B8.33609>
  185. van Vendeloo SN, Godderis L, Brand PLP, Verheyen K, Rowell SA, Hoekstra H. Resident burnout: evaluating the role of the learning environment. *Bmc Med Educ*. 2018;18(PG-). doi:10.1186/s12909-018-1166-6
  186. van Vendeloo SN, Prins DJ, Verheyen C, et al. The learning environment and resident burnout: a national study. *Perspect Med Educ*. 2018;7(2 PG-120-125):120-125. doi:10.1007/s40037-018-0405-1
  187. Waheed K, Liaqat N, Ejaz S, et al. Burnout among gynaecological residents in lahore, Pakistan: A cross-sectional survey. *J Pak Med Assoc*. 2017;67(9 PG-1318-1322):1318-1322. <http://jpma.org.pk/PdfDownload/8342.pdf>  
<http://ovidsp.ovid.com/ovidweb.cgi?T=JS&PAGE=reference&D=emexa&NEWS=N&AN=617643712> NS -.
  188. Waldman S V, Lopez Diez JC, Arazi HC, Linetzky B, Guinjoan S, Grancelli H. Burnout, perceived stress, and depression among cardiology residents in Argentina. *Acad Psychiatry*. 2009;33(4 PG-296-301):296-301. doi:<http://dx.doi.org/10.1176/appi.ap.33.4.296>
  189. Weigl M, Schneider A, Hoffmann F, Angerer P. Work stress, burnout, and perceived quality of care: a cross-sectional study among hospital pediatricians. *Eur J Pediatr*. 2015;174(9 PG-1237-1246):1237-1246. doi:10.1007/s00431-015-2529-1
  190. West CP, Tan AD, Habermann TM, Sloan JA, Shanafelt TD. Association of resident fatigue and distress with perceived medical errors. *JAMA - J Am Med Assoc*. 2009;302(12 PG-1294-1300):1294-1300. doi:<http://dx.doi.org/10.1001/jama.2009.1389>
  191. Willcock SM, Daly MG, Tennant CC, Allard BJ. Burnout and psychiatric morbidity in new medical graduates. *Med J Aust*. 2004;181(7 PG-357-360):357-360. <http://ovidsp.ovid.com/ovidweb.cgi?T=JS&PAGE=reference&D=emed9&NEWS=N&AN=39341646> NS -.
  192. Williford ML, Scarlet S, Meyers MO, et al. Multiple-Institution Comparison of Resident and Faculty Perceptions of Burnout and Depression During Surgical Training. *JAMA Surg*. 2018;(PG-). doi:<https://dx.doi.org/10.1001/jamasurg.2018.0974>
  193. Woodside Jr JR, Miller MN, Floyd MR, McGowen KR, Pfortmiller DT. Observations on burnout in family medicine and psychiatry residents. *Acad Psychiatry*. 2008;32(1 PG-13-19):13-19. doi:<http://dx.doi.org/10.1176/appi.ap.32.1.13>
  194. Yroni A, Fournier C, Fourcade O, Schmitt L. Burnout compared between anaesthesiology and psychiatry residents in France: An observational study. *Eur J Anaesthesiol*. 2017;34(7 PG-480-482):480-482. doi:<https://dx.doi.org/10.1097/EJA.0000000000000573>
  195. Zis P, Anagnostopoulos F, Sykioti P. Burnout in medical residents: A study based on the job demands-resources model. *Sci World J*. 2014;2014(PG-673279):673279. doi:<http://dx.doi.org/10.1155/2014/673279>

196. Zis P, Artemiadis AK, Lykouri M, et al. Residency Training: Determinants of burnout of neurology trainees in Attica, Greece. *Neurology*. 2015;85(11 PG-81-84):e81-e84. doi:<http://dx.doi.org/10.1212/WNL.0000000000001924>
197. Zubairi AJ, Noordin S. Factors associated with burnout among residents in a developing country. *Ann Med Surg*. 2016;6(PG-60-63):60-63. doi:<http://dx.doi.org/10.1016/j.amsu.2016.01.090>
